# Supplementary material for: Isolation, Characterization, and Expression Analysis of NAC Transcription Factor from Andrographis paniculata (Burm. f.) Nees and Their Role in Andrographolide Production
Source: MDPI journal article supplement (doi:10.3390/genes15040422), 2024-03-28
Supplement: s1 [file s1]

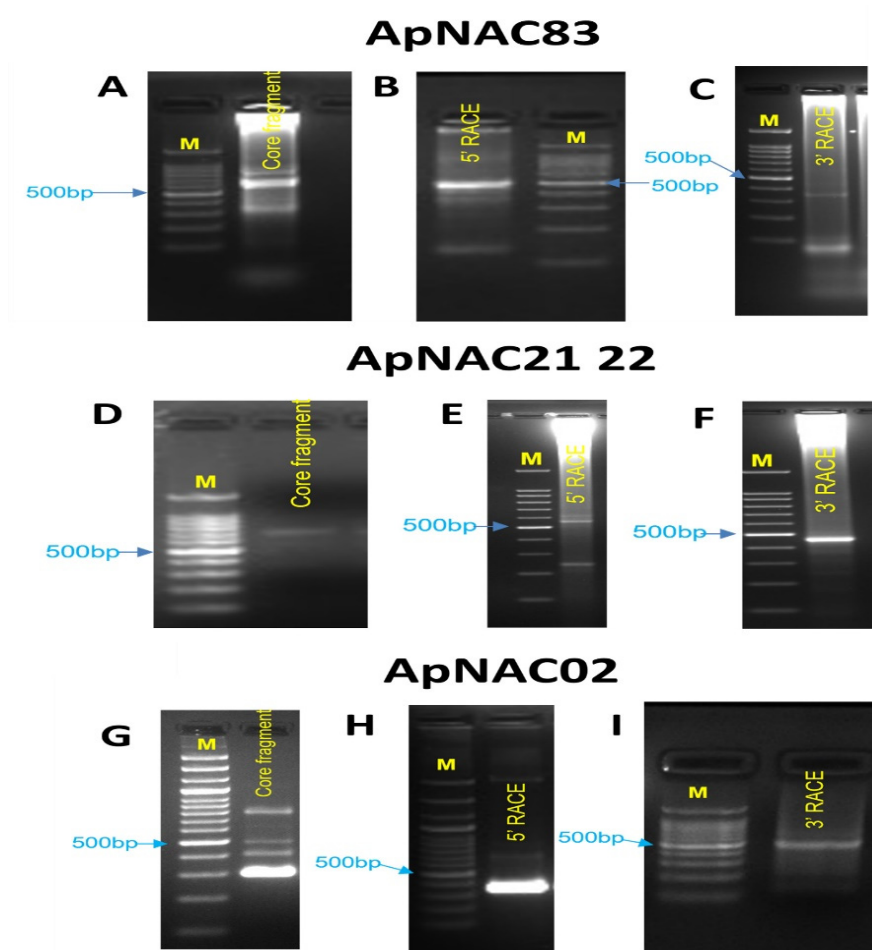

**Supplementary Figure S1:** Gel image of PCR amplicons: (A) PCR product of core fragment of *ApNAC83*; (B) 5' RACE PCR amplicon of *ApNAC83*; (C) 3' RACE PCR amplicon of *ApNAC83*; (D) PCR product of core fragment of *ApNAC21 22*; (E) 5' RACE PCR amplicon of *ApNAC21 22*; (F) 3' RACE PCR amplicon of *ApNAC21 22*; (G) PCR product of core fragment of *ApNAC02*; (H) 5' RACE PCR amplicon of *ApNAC02*; (I) 3' RACE PCR amplicon of *ApNAC02*. The yellow text (Core fragment, 5' RACE and 3' RACE) is used to indicate the ID of the loaded PCR product in the well and M indicates the 100 bp ladder. Where 5' RACE= 5' Random amplification of cDNA ends; 3' RACE=3' Random amplification of cDNA ends; Core fragment= PCR product of known partial transcript of the genes.

```

1  ACCTATCCCCCTCTCTCTCTCTCTCTCTCTCTCTCTCTCTCTCTCTGCTTCTTGTGTTTTATCACGCTGCCCT
2  GTTCAACTAAGAATAATAGTAATAATAAAAAGGGAGTGTGGGTACGTGTGGGAGGGATTCTTGACCATT
3  GATGATGAGTTTGAGCTTGTTCTAAGAAAGGGGTTTTTGAGAGGGGGGCTGGAAAAGGCAATCTTGGT
4  TTCAGTTCCTCTTGTGTCAAATAATATAGAGAATAGATGAGTTCGAGAGCCAACCTTGTCAGAATGGG
5  GTGCTGAGACTGCCGCCTGGGTTCAAGTCCACCCAAGTGAAGAGCTCGTGGTACAATACTTGAAG
6  CGCAAGGTGGCGTCATATCCTCTGCCGGCTTCTGTAATCTCTGAAGTTGAGGTCTGCAAGTTTGATCCCT
7  GGGATTGCCAGGTGGTTCAGAGCAGGAGAAGTATTTTTTCAGCACTAGGGAGGTGAAGTACCCAAAT
8  GGGAACCGGTGCAATAGGGCCACCGTTCAAGGCTATTGGAAGGCAACAGGACTGGACAAGCAGATAA
9  TGAGCTCCAGGAGCCACCAGATTGTGGGGATGAAGAAGACTCTAGTGTCTACAGAGGGAAGCCTCCA
10 AAGGGTTGCAGAACTGATTGGGTTATGCACGAGTATCGCCTCAGTAGCAATAGTTCCCAACAGCAGCAG
11 CTGGGCAAGGATTTAGGCCAGGAAAATTGGGTCCTCTGCAGGATTTTCTTGAAGAGGAGAGGCAAGAA
12 AAGTGATGGTGATGCTGCTGCTGCTGAAACAGGGAACAAGAAGACCGGTTCAACACCGGTTTTCTATGA
13 TTTTATGGGTAAGGAGAGGACTGACCTGAATCAACTCCCTGCTGATTCAGCCTCTGCTTCAAGTGGGATC
14 ACAGAGATTTCAAACAGGAATGAAGGAGAGGACTGACTTGAATCAACTCCCTGCTGATTCAGCCTCTGC
15 TTCAAGTGGGATCACAGAGATTTCAAACAGGAATGAATCAGAAGAGCTTGAAGAAAGGAGCAGTTGCA
16 ATAGTCTGCCCCTCTCTAGCAAGAAAGCAATGCCCTAGAAAAGTTAAAAAAAAAAAAAAAAAAAAA

```

**Supplementary Figure S2:** Full length cDNA of *ApNAC83*. The full-length cDNA sequence (1102bp) contains 247 bp 5' UTR (Yellow highlighted upstream region), 168 bp 3'UTR (Yellow highlighted downstream) and 687 bp CDS region. Start and stop codon have been highlighted with green and red colour, respectively.

```

1  ACGTATGACCTTTCTTCAAACGGTATTATACATCACAGAAATTTCCAGTAGCCCTCTGTATTGCCCTC
2  TCCCTTCTCTCCCTCATCTTCCATCCATTACATCAATTCACACACACACACACACGACTATATAT
3  ATATATGTGTGTGTATATATATAGCAGGAGCAGAAAGGGATGAGCTTGAGCAGCGTGGAGGATCG
4  GCTGCCGGCGGGATTGAGGTTCCACCCCAAAGATGAGGAGCTGATATGTGAGTACCTTAACAAATG
5  GCTAGGTGGTTGTCCTCACCCCTTCCCTTCCTTGATCCAAGTCGACCTCAATAAGTGCAGCCTTGGG
6  ACATTCCTGAAGCTGCACGTGTTGGAGGCAAGGAATGGTATTTCTACACCCGGAGAGACAAAAAT
7  ACGCGACCGGTCTGAGAACGAACCGGTCGACGCTATACGGGTACTGGAAGGCAACCGGGAAGGAC
8  CGGCCGGTCCCTTCAGAAGAAAACGGTTGTCGGAATGCGAAAGACACTGGTGTCTATGAGGGCCGG
9  GCTCCCAAAGGATGGAAAACCGATTGGGTTATGCACGAGTTTCGCCAGCATGGGCCCGGCCGACG
10 AAAGCATCACATCCTTGTAAGGAGGACTGGGTGCTATGCAGGGTATTCTTCAAAGCAGGAGAGAA
11 ATGAGCAAAATTCCAACCAACAAGGCGCTAGTGCAGGGCAAAGGCTAGAGGTGACGACATCCCCA
12 AGTTCTCCATCGATGCTCCCGGGACTAATGGACCAAGCGTTCACGATCCCATACGAAGTCGCCTCTG
13 AGCAAGTGCCCTGCTTCTCAATTTCAACGAAACAAGCCCTAACTTCTCTGAGCTCCTGGACCCGCC
14 CAAATCTTCTTACAGTACCCAGCTCCTGCTCATTCCACAACGACGATGCAACAGCCTGCAGGAATTGT
15 TGATAATATTAGCTCAATAATAATAATAATAATAATAATTCCGTCGAAAAAAAAAAAAA

```

**Supplementary Figure S3:** Full-length cDNA of *ApNAC21 22*. The full-length cDNA sequence (996 bp) contains 178 bp 5' UTR (Yellow highlighted upstream region), 47 bp 3'UTR (Yellow highlighted downstream region) and 771 bp CDS region. Start codon and stop codon have been highlighted with green and red colour, respectively.

```

1  CTCCCCCGATACCAACCGACCTTCACTCACTCACTTCTCCCAACCCTACCATGGCCGCCGCCGGAGAT
2  CTCCATCTGCCGCCGGGATTTCGCTTCCACCCTACCGACGAGGAGCTCGTCATGCACTACCTCTGCCG
3  GAAATGCTCTGCGCAGTCGATTGCCGTTCCGATTGTGGCCGAAATCGACCTCTACAAGTACGATCCG
4  TGGGAACTTCCAGGTTTGGCTTTGTACGGCGAGAAAGAGTGGTATTTCTTCTCTCCGAGAGACCGGA
5  AGTACCCTAACGGTTCGAGACCTAACCGCGCCGCCGGTAGCGGTTACTGGAAGGCCACCGGAGCTG
6  ATAAACCGATCGGACATCCGAAGCCTGTTGGTATTAAGAAAGCTTTGGTGTTTTACTCCGGCAAGGC
7  GCCGAAAGGCGAAAAGACGAATTGGATTATGCACGAGTATCGCCTCGCCGACGTCGACCGCTCCGC
8  CCGCCGGAAGGACCGCAGCCTCAGGCTGGATGAGTGGGTGCTTTGCCGGATATACAACAAGAAGG
9  GATCAATCGAGAAGCCGCCGGCGACGGCGCCGCCGAGAGGGAAGCGACGCCGGCGGAGGAAAC
10 AAAGCCAGCCGTGATGAAGACGGTGGCCGACGCGTCGCCGATGGTGTACGACGAGTTTATGTATCT
11 TGACCCGTCGGAATCCATGGGGTCCGAGCACGTGCTGTCGCCGGAGGTGGAGAGCACGCCGAAGC
12 TGACGGAGTGGGAGAAATCCACCCTCGGCTATCCATTCAACTACCTCGGCGGCGGGCCGCCATTGTC
13 GCGGCGGCGGCGGCGGCGGCAGTTTCAGGGTGGTAACTTTCCGGTGGAGGCGGCAATGCCGGATT
14 TGTTAGCCTTTATTACAAAGCAGTGC TGAGGTGAACCAATGAGGGGCGTCCACGTGGCATAGGAAA
15 CTTGCAAAATGACAATTCTATGAAAGTGCCCCCCCCGGAGGAATATGAATGAAAAATTTGTGGATT
16 GTAAAAAAAAAAAAAAAAA

```

**Supplementary Figure S4:** Full-length cDNA of *ApNAC02*. The full-length cDNA sequence (1011 bp) contains 50 bp 5' UTR (Yellow highlighted upstream region), 121 bp 3'UTR (Yellow highlighted downstream region) and 840 bp CDS region. Start codon and stop codon have been highlighted with green and red colour, respectively.

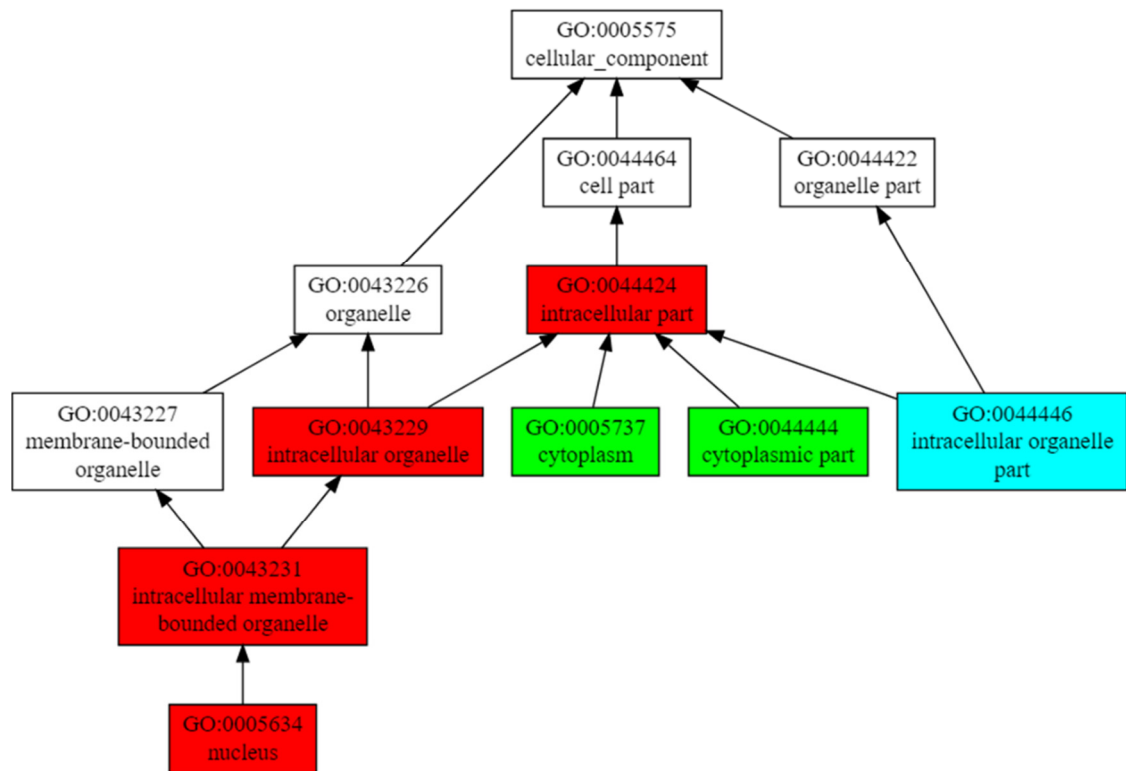

**Supplementary Figure S5:** Cellular component prediction of *ApNAC83* protein.

**LOCTREE 3**  
Protein Subcellular Localization Prediction System

| Protein ID                                                                                                                                                                                                                                                                                                                                                                                                                                                                                                                                                                                                                                                                                                                                                                                                                                                                                           | Score | Expected Accuracy | Localization Class | Gene Ontology Terms      | Annotation Type |
|------------------------------------------------------------------------------------------------------------------------------------------------------------------------------------------------------------------------------------------------------------------------------------------------------------------------------------------------------------------------------------------------------------------------------------------------------------------------------------------------------------------------------------------------------------------------------------------------------------------------------------------------------------------------------------------------------------------------------------------------------------------------------------------------------------------------------------------------------------------------------------------------------|-------|-------------------|--------------------|--------------------------|-----------------|
| ApNAC83                                                                                                                                                                                                                                                                                                                                                                                                                                                                                                                                                                                                                                                                                                                                                                                                                                                                                              | 48    | 89%               | nucleus            | nucleus GO:0005634(IDA); | PSI-BLAST       |
| <div> <div> Predicted Localization: nucleus </div> <div>  </div> <div> <p>&gt;NAC29_ARATH</p> <p>Identities = 92/163 (56%), Positives = 110/163 (67%), Gaps = 5/163 (3%)</p> <p>Query: 12 VLRPPGFRFHPTDEELVVQYLKRKVASYPSPASVISEVECKFDWDLPGGSE---QEK 68</p> <p>LPPGFRFHPTDEEL+V YL+ + S P P S+I EV++ KFDPW LP +E E</p> <p>Sbjct: 6 QSTLPPGFRFHPTDEELIVYVLRNQTHSKPCPVSIPEVDIYKFDWQLPEKTEFGENEW 65</p> <p>Query: 69 YFFSTREVKYPNGHRSRATGSGYKATGLDKQTHSSRSQIVGKKTLYFYRGKPPKGG 128</p> <p>YFFS RE KYPNG R HRA SGYKATG DK I S S+ VG+KK LVEYAg+PPKG</p> <p>Sbjct: 66 YFFSPREKYPNGVRPHRAAVSGYKATGDKATHSGSSH--VGKKALVFYKGRPPKGI 123</p> <p>Query: 129 RTDMVMHEYRLSNSSQQQLGKDLGQENMVLCRIFLKRRGKK 171</p> <p>+TDM+MHEYRL + + + + WLCRI+ KR K</p> <p>Sbjct: 124 KTDIMMHEYRLHDSRKASTKRNGSMRLDEWLCRIYKRGASK 166</p> </div> </div> |       |                   |                    |                          |                 |

**Supplementary Figure S6:** Subcellular localization of *ApNAC83*

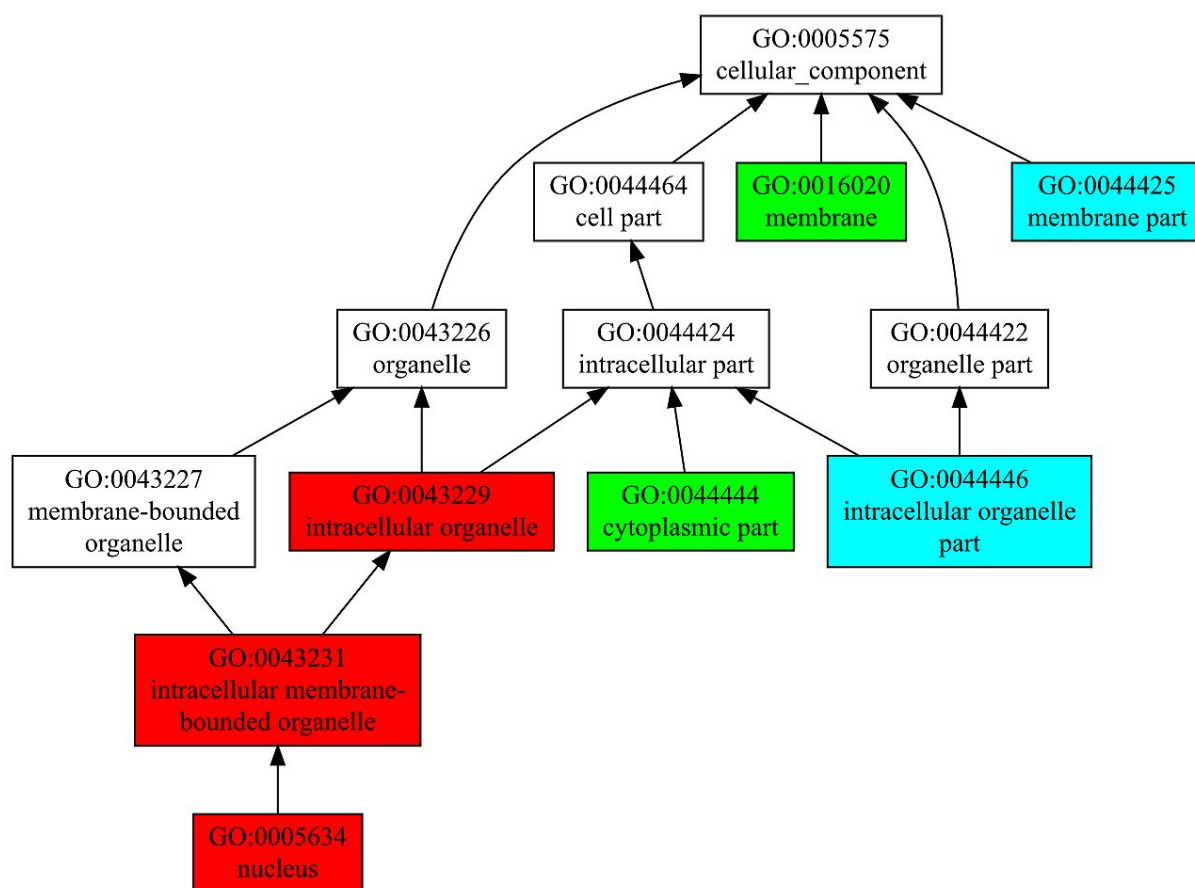

**Supplementary Figure S7:** Cellular component prediction of *ApNAC21 22* protein.

| Protein ID | Score | Expected Accuracy | Localization Class | Gene Ontology Terms      | Annotation Type |
|------------|-------|-------------------|--------------------|--------------------------|-----------------|
| ApNAC21    | 47    | 89%               | nucleus            | nucleus GO:0005634(IEA); | PSI-BLAST       |

Predicted Localization: nucleus



>NAC22\_ARATH

Identities = 128/247 (51%), Positives = 155/247 (62%), Gaps = 25/247 (10%)

Query: 1 EQKGSLSSVEDRLPAGFRFHPKDELCIYVL-NKWLGGCPHPFSLIQVDLNKCEPMDI 59  
E K S+S VE +LP GFRFHPKD+EL+C+YL + L P LIQVDLNKCEPMDI  
Sbjct: 6 ENKESSTSMVEAKLPPGFRFHPKDOELVCDYLMRRSLHNNHRPPLVLIQVDLNKCEPMDI 65

Query: 60 PEAARVGGKEMFYTRRDKKYATGLRTNRSTLYGYWKATGKDRPVLQKKTIVGMRKTLVF 119  
P+ A VGGK+MYFY++RD+KYATGLRTNR+T GYWKATGKDR +L+K +VGMKTLVF  
Sbjct: 66 PKMACVGGKDMFYYSQRDKYATGLRTNRATATGYWKATGKDRITILRKGKLVGMRKTLVF 125

Query: 120 YEGRAPKGKTDWVMHEFRQ---HGPGPTKASHPKCEDAVLCRVFKSRREHSKIPTKQG 176  
Y+GRAP+G KTDWVMHEFR H P S P KEDAVLCRVF K +G  
Sbjct: 126 YQGRAPRGKTDWVMHEFRQLQGSHPHNSLSLP-KEDAVLCRVFHK-----NTEG 175

Query: 177 ASAGQRLEVTTPSSPSMLPGLNDQAFITPYE-----VASEQVPCFSNIFNETSP 225  
+ ++ + LP LND E + +E VPCFSN ++  
Sbjct: 176 VICRDMNGSCFDEATASLPLNDPYINFQDEPSSYLSDDHYIINEHVPCFSNLSQMQT 235

Query: 226 MFSELLD 232  
S L +  
Sbjct: 236 LNSILTN 242

Supplementary Figure S8: Subcellular localization of *ApNAC21* 22.



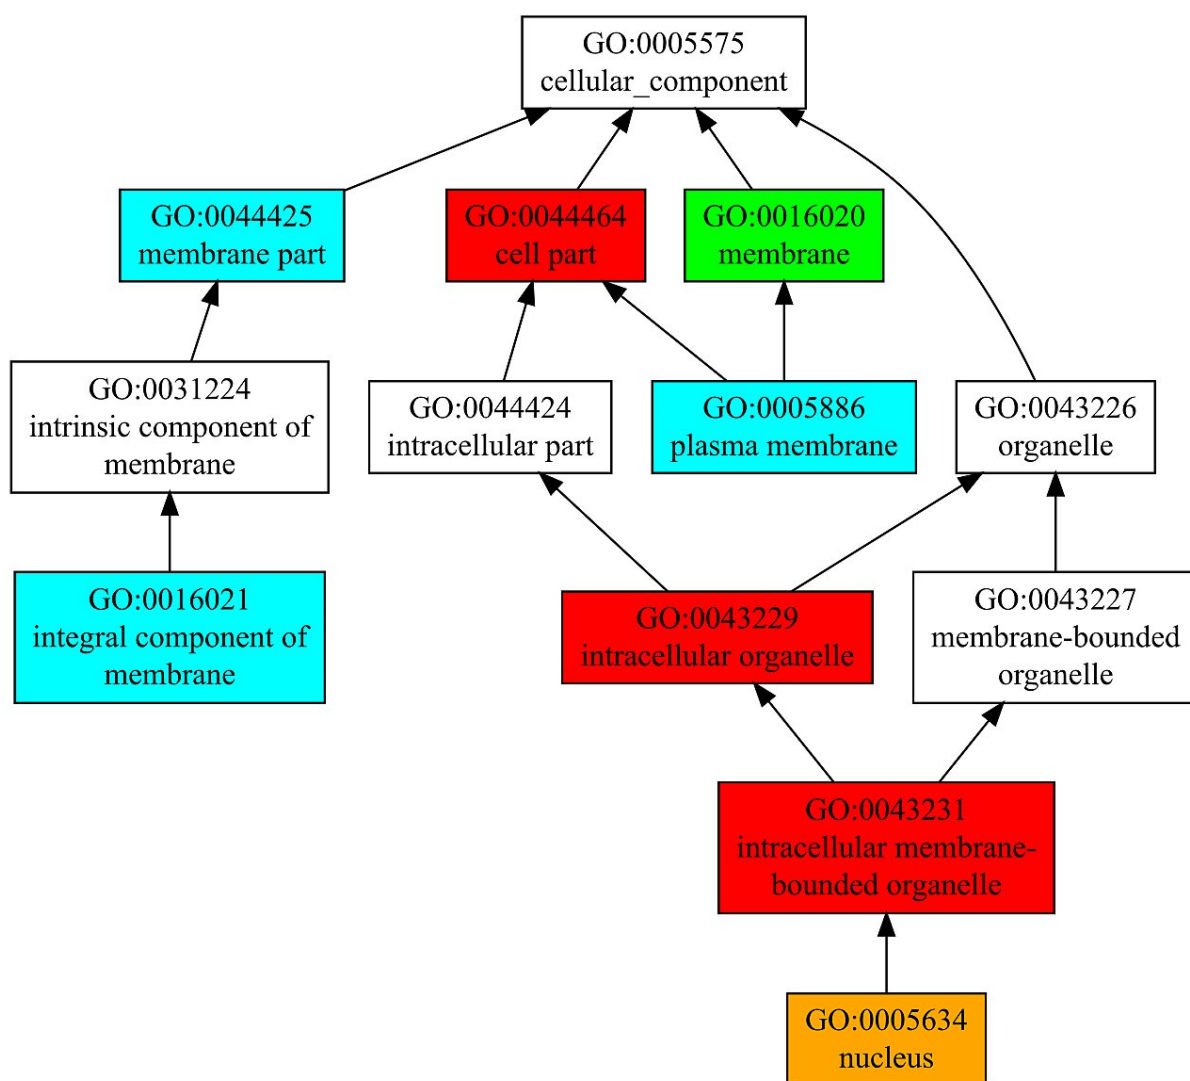

**Supplementary Figure S9:** Cellular component prediction of *ApNAC02* protein

| Protein ID                                                                                                                                                                                                                                                                                                                                                                                                                                | Score | Expected Accuracy | Localization Class | Gene Ontology Terms      | Annotation Type |
|-------------------------------------------------------------------------------------------------------------------------------------------------------------------------------------------------------------------------------------------------------------------------------------------------------------------------------------------------------------------------------------------------------------------------------------------|-------|-------------------|--------------------|--------------------------|-----------------|
| ApNAC02                                                                                                                                                                                                                                                                                                                                                                                                                                   | 48    | 89%               | nucleus            | nucleus GO:0005634(IDA); | PSI-BLAST       |
| <div> <div> Predicted Localization: nucleus </div> <div>  </div> </div> <div> <div>&gt;NAC29_ARATH</div> <div>Identities = 21/36 (58%), Positives = 30/36 (83%)</div> <div>Query: 68 MHEYRLADVDRSARRKDRSLRLDEWVLCRIYKKGGS 103</div> <div>MHEYRL D +++ +++ S+RLDEWVLCRIY K+G+</div> <div>Sbjct: 129 MHEYRLHDSRKASTKRIGSMRLDEWVLCRIYKKGGA 164</div> </div> |       |                   |                    |                          |                 |

Supplementary Figure S10: Sub cellular localization of *ApNAC02*

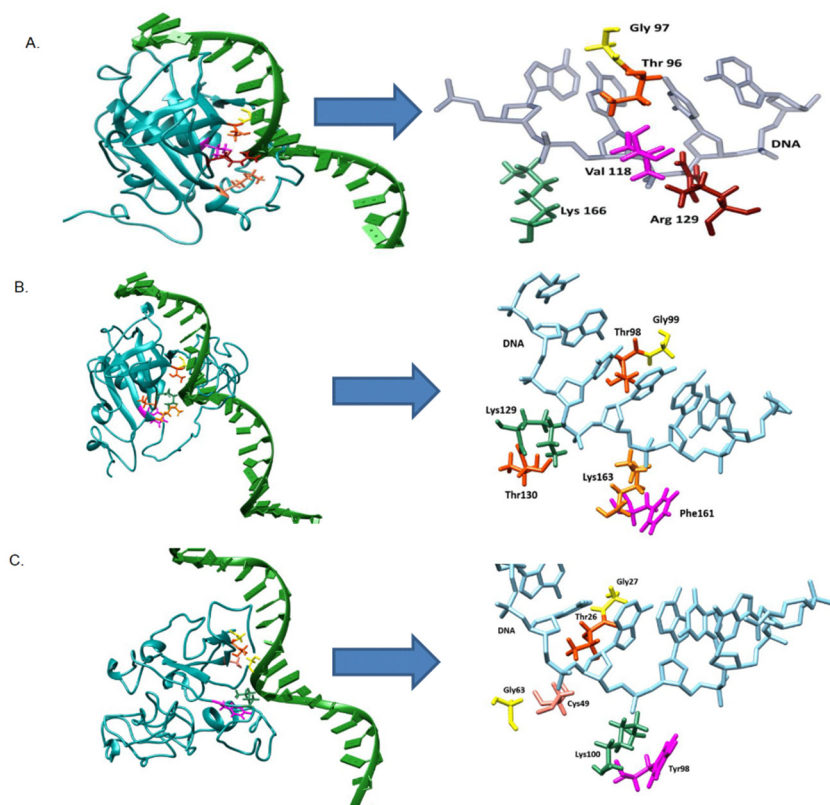

**Supplementary Figure S11:** DNA binding site prediction: A. predicted structure of *ApNAC83* with DNA. B. predicted the structure of *ApNAC21* 22 with DNA. C. predicted structure of *ApNAC02* with DNA

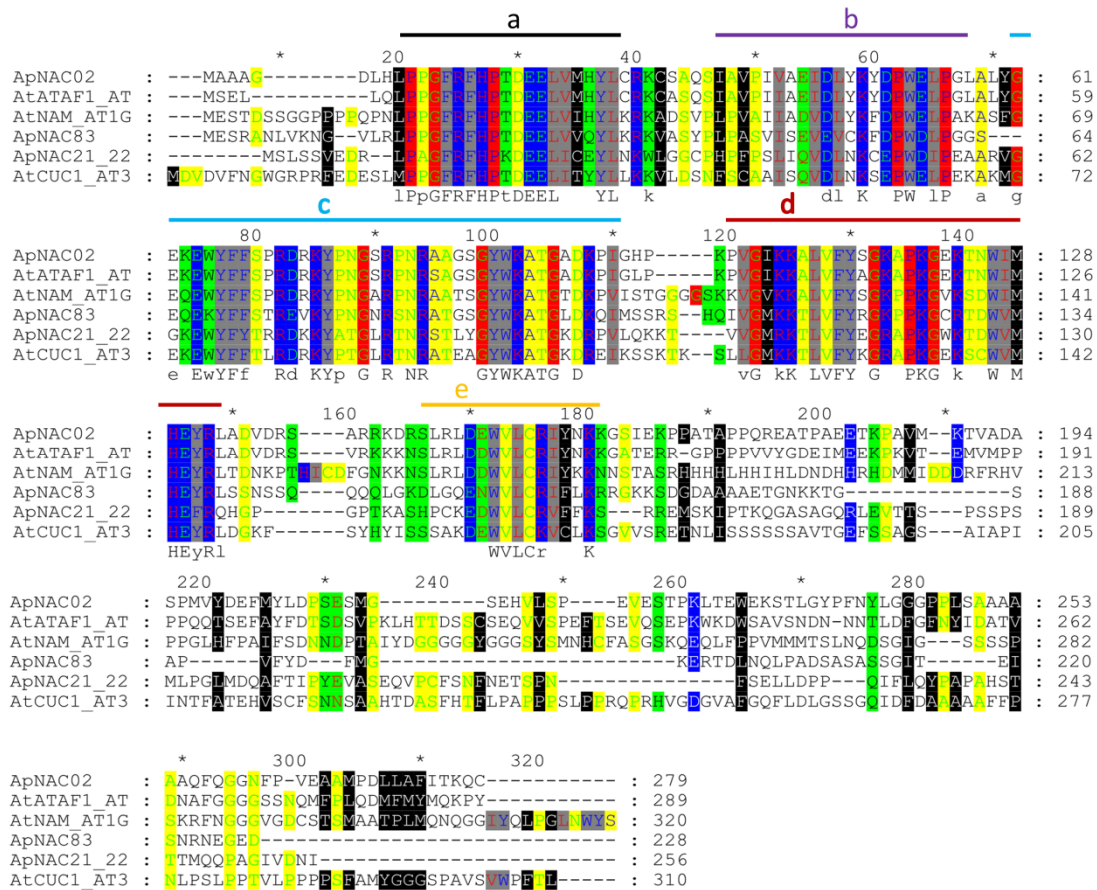

**Supplementary Figure S12:** Multiple sequence alignment of the deduced amino acid sequences of isolated NACs (*ApNAC02*, *ApNAC21\_22*, and *ApNAC83*) along with other known NAC domain proteins from *Arabidopsis thaliana* (*AtNAM*, *AtATAF1*, and *AtCUC1*). The alignment highlighted the positions of the five highly conserved subdomains (a–e) within the NAC domain, visually represented by lines above the sequences.

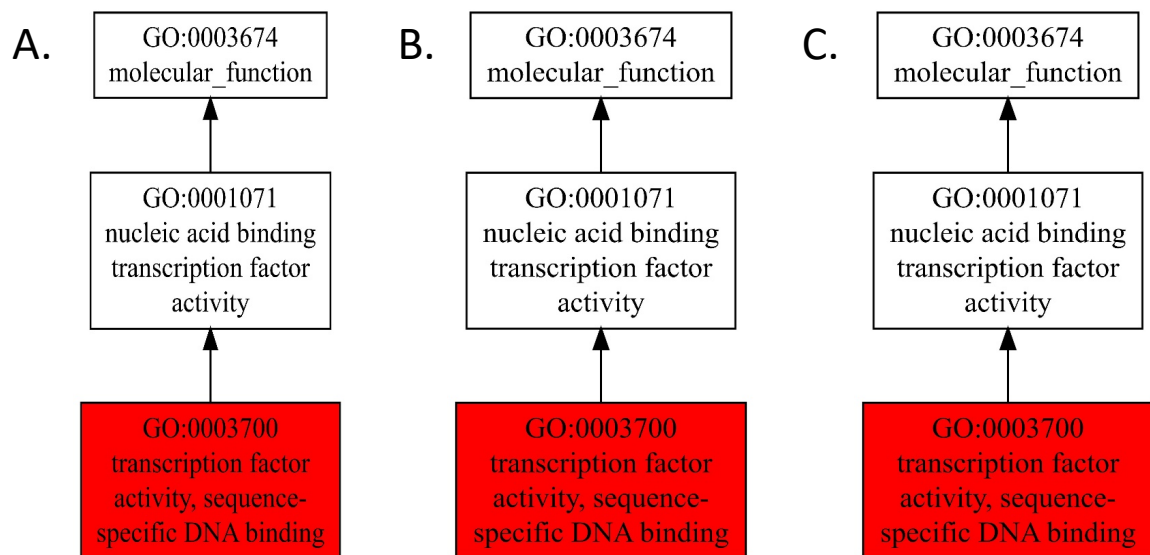

**Supplementary Figure S13:** Molecular function prediction: A. *ApNAC83*. B. *ApNAC21*. C. *ApNAC02*.

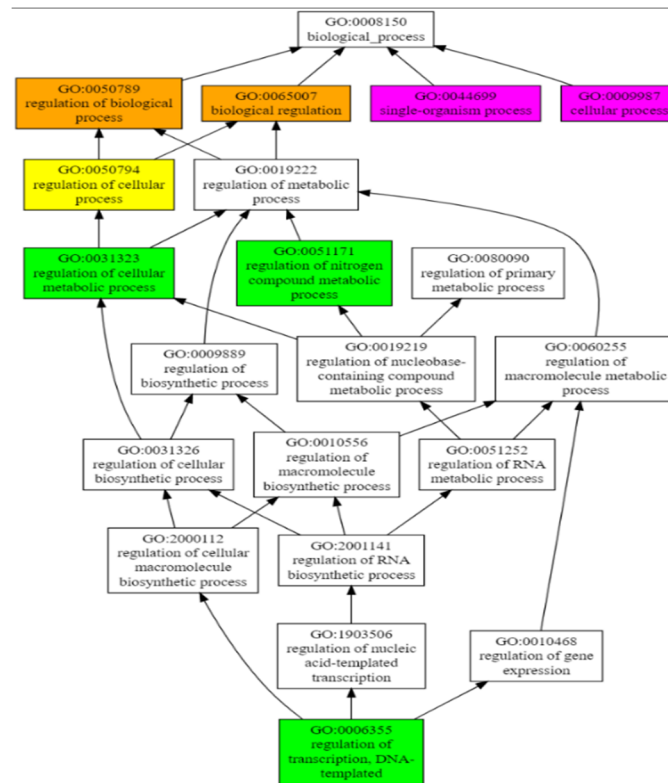

Supplementary Figure S14: Biological process prediction of *ApNAC83*.

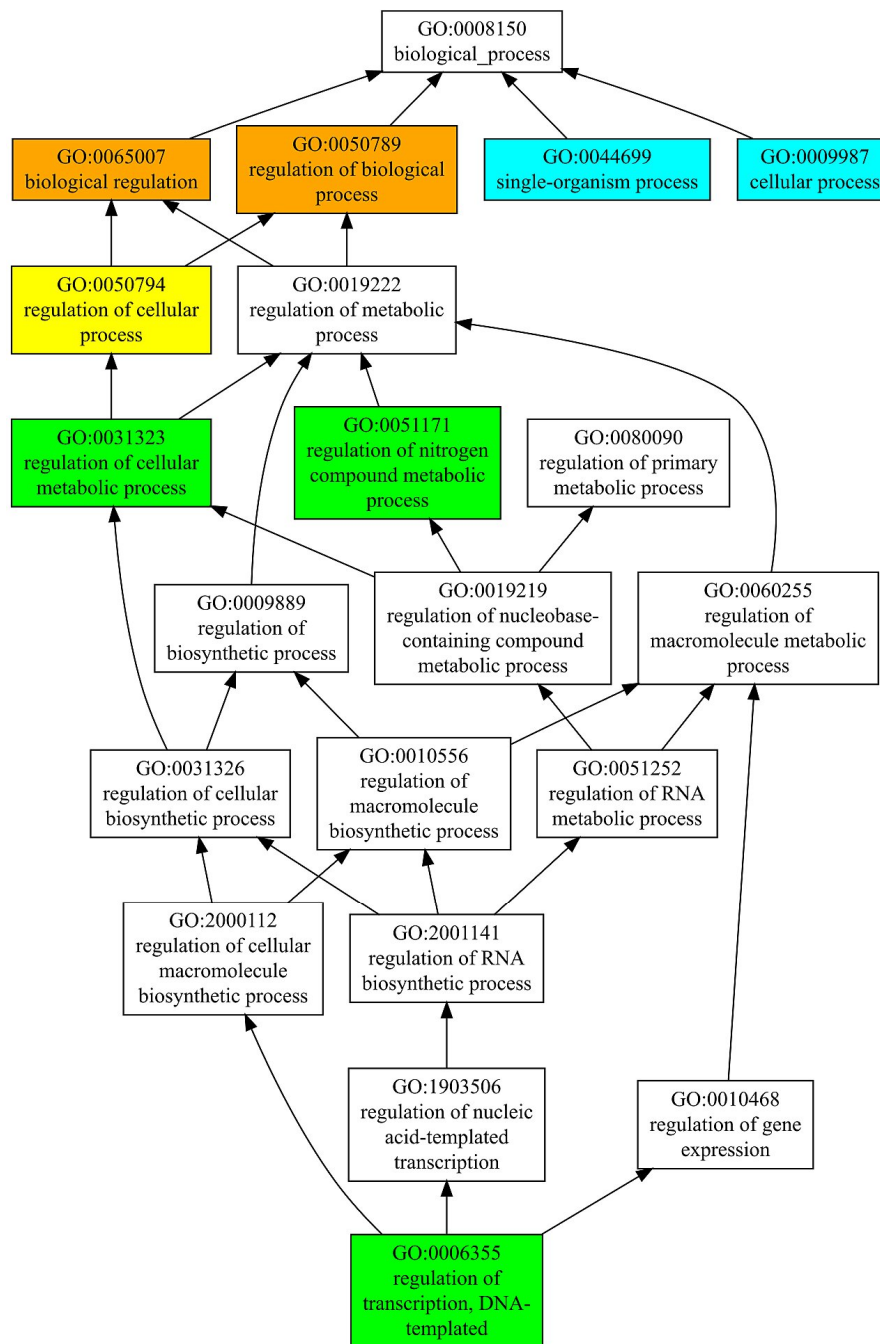

**Supplementary Figure S15:** Biological process prediction of *ApNAC21 22*.

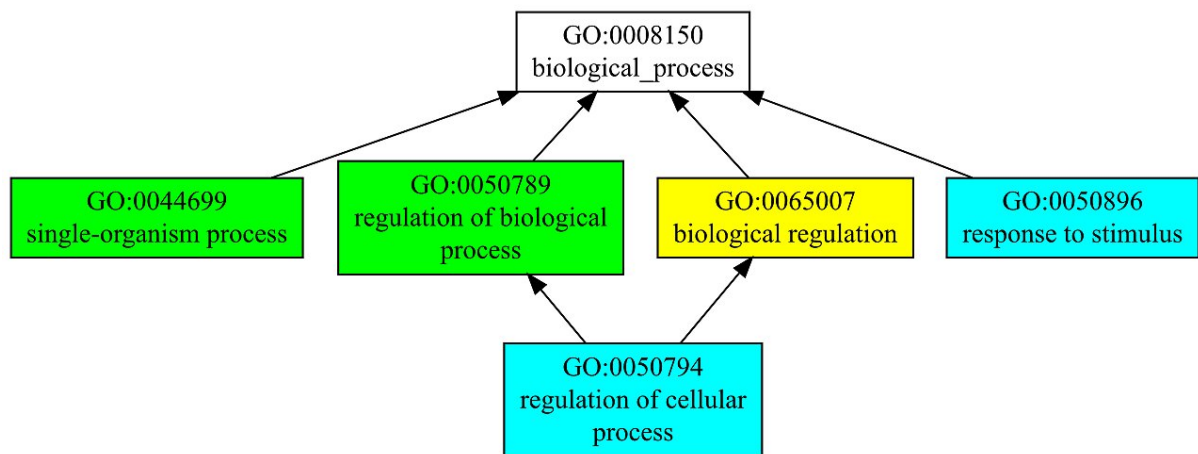

**Supplementary Figure S16:** Biological process prediction of *ApNAC02*.



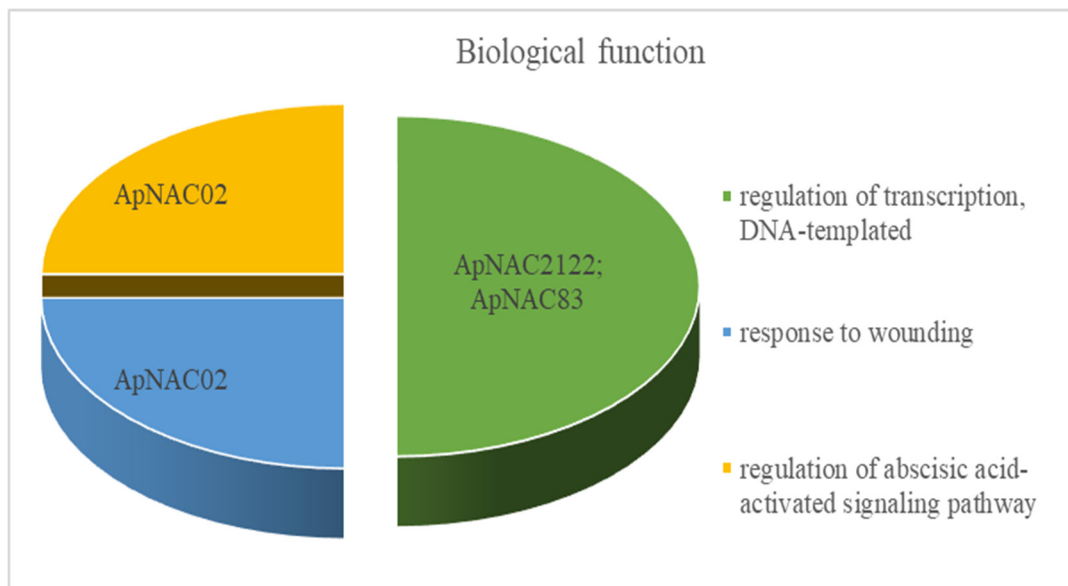

**Supplementary Figure S17:** Gene ontology classification of NAC gene sequences under biological process.

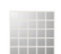

SHIMADZU  
LabSolutions

## Analysis Report

### <Sample Information>

Sample Name : ABA1  
Sample ID : ABA1  
Data Filename : 07-12-21AMIT009.lcd  
Method Filename : AMIT NM.lcm  
Batch Filename : amit.lcb  
Vial # : 1-23  
Injection Volume : 5 uL  
Date Acquired : 08-12-2021 02:05:56  
Date Processed : 03-01-2022 18:19:42

Sample Type : Unknown

Acquired by : System Administrator  
Processed by : System Administrator

### <Chromatogram>

mAU

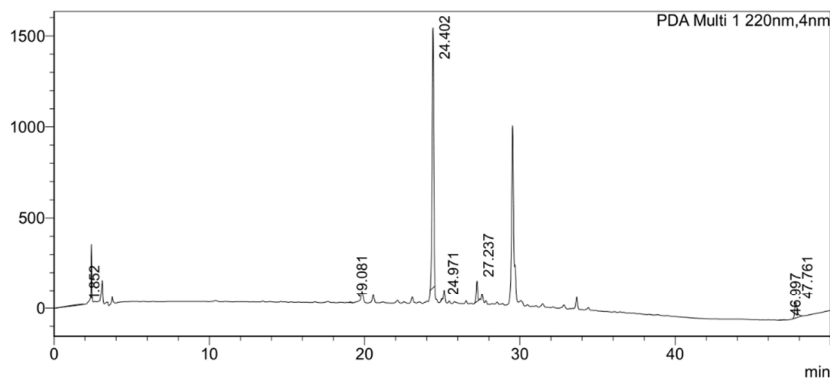

### <Peak Table>

PDA Ch1 220nm

| Peak# | Ret. Time | Area     | Height  | Conc. | Name |
|-------|-----------|----------|---------|-------|------|
| 1     | 1.852     | 257608   | 2519    | 0.000 |      |
| 2     | 19.081    | 26953    | 4150    | 0.018 | AP-4 |
| 3     | 24.402    | 10442144 | 1427079 | 1.847 | AP-1 |
| 4     | 24.971    | 41233    | 7509    | 0.134 | AP-3 |
| 5     | 27.237    | 738918   | 117175  | 0.405 | AP-2 |
| 6     | 46.997    | 19381    | 1783    | 0.000 |      |
| 7     | 47.761    | 1023940  | 85048   | 0.000 |      |
| Total |           | 12550176 | 1645263 |       |      |

**Supplementary Figure S18:** HPLC analysis report of four different bioactive of *Andrographis paniculata* under ABA treatment (0h): where AP-1 is andrographolide and AP-2 is neo-andrographolide (AP-2), AP-3 is 14-deoxyandrographolide, and AP-4 is andrographolide glycoside

## <Sample Information>

Sample Name : ABA2  
Sample ID : ABA2  
Data Filename : 07-12-21AMIT010.lcd  
Method Filename : AMIT NM.lcm  
Batch Filename : amit.lcb  
Vial # : 1-24  
Injection Volume : 5 uL  
Date Acquired : 08-12-2021 02:56:34  
Date Processed : 03-01-2022 18:19:46

Sample Type : Unknown

Acquired by : System Administrator  
Processed by : System Administrator

## <Chromatogram>

mAU

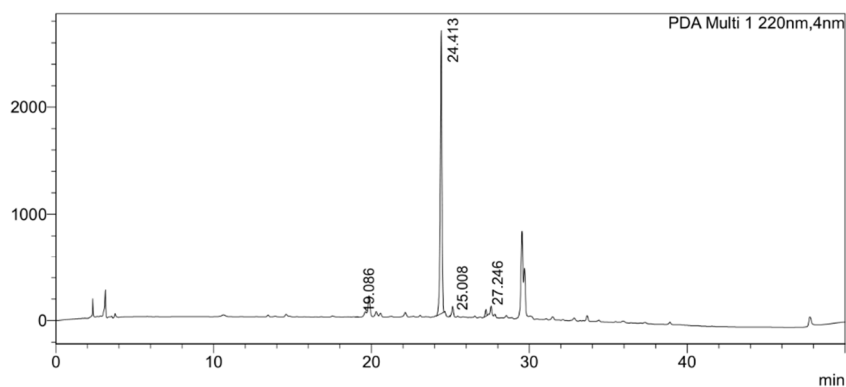

## <Peak Table>

PDA Ch1 220nm

| Peak# | Ret. Time | Area     | Height  | Conc. | Name |
|-------|-----------|----------|---------|-------|------|
| 1     | 19.086    | 29522    | 4564    | 0.019 | AP-4 |
| 2     | 24.413    | 19296887 | 2649630 | 3.406 | AP-1 |
| 3     | 25.008    | 52154    | 9629    | 0.163 | AP-3 |
| 4     | 27.246    | 367877   | 62395   | 0.204 | AP-2 |
| Total |           | 19746440 | 2726218 |       |      |

**Supplementary Figure S19:** HPLC analysis report of four different bioactive of *Andrographis paniculata* under ABA treatment (6h): where AP-1 is andrographolide and AP-2 is neo-andrographolide (AP-2), AP-3 is 14-deoxyandrographolide, and AP-4 is andrographolide glycoside.

## <Sample Information>

Sample Name : ABA3  
Sample ID : ABA3  
Data Filename : 07-12-21AMIT011.lcd  
Method Filename : AMIT NM.lcm  
Batch Filename : amit.lcb  
Vial # : 1-25  
Injection Volume : 5 uL  
Date Acquired : 08-12-2021 03:47:13  
Date Processed : 03-01-2022 18:19:53

Sample Type : Unknown  
Acquired by : System Administrator  
Processed by : System Administrator

## <Chromatogram>

mAU

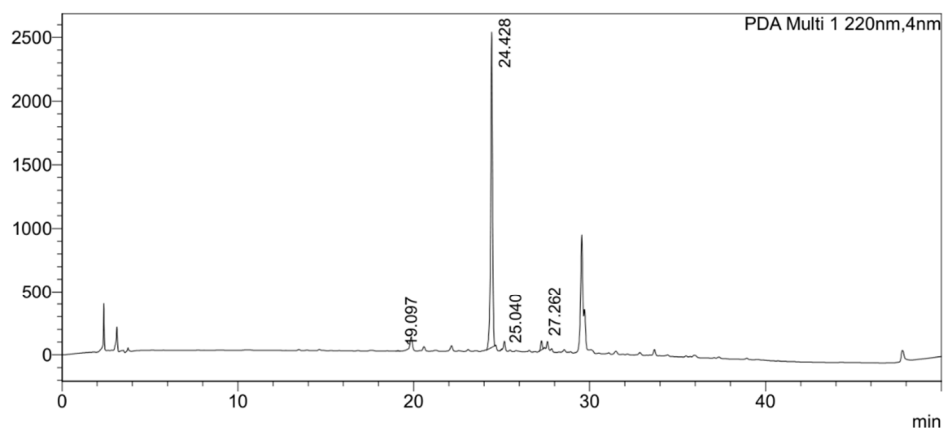

## <Peak Table>

PDA Ch1 220nm

| Peak# | Ret. Time | Area     | Height  | Conc. | Name |
|-------|-----------|----------|---------|-------|------|
| 1     | 19.097    | 23685    | 3497    | 0.017 | AP-4 |
| 2     | 24.428    | 18387554 | 2483306 | 3.246 | AP-1 |
| 3     | 25.040    | 23224    | -298    | 0.085 | AP-3 |
| 4     | 27.262    | 424577   | 72995   | 0.234 | AP-2 |
| Total |           | 18859041 | 2559500 |       |      |

**Supplementary Figure S20:** HPLC analysis report of four different bioactive of *Andrographis paniculata* under ABA treatment (12h): where AP-1 is andrographolide and AP-2 is neo-andrographolide (AP-2), AP-3 is 14-deoxyandrographolide, and AP-4 is andrographolide glycoside.

## <Sample Information>

Sample Name : ABA4  
Sample ID : ABA4  
Data Filename : 07-12-21AMIT012.lcd  
Method Filename : AMIT NM.lcm  
Batch Filename : amit.lcb  
Vial # : 1-26  
Injection Volume : 5 uL  
Date Acquired : 08-12-2021 04:37:52  
Date Processed : 03-01-2022 18:19:57

Sample Type : Unknown  
Acquired by : System Administrator  
Processed by : System Administrator

## <Chromatogram>

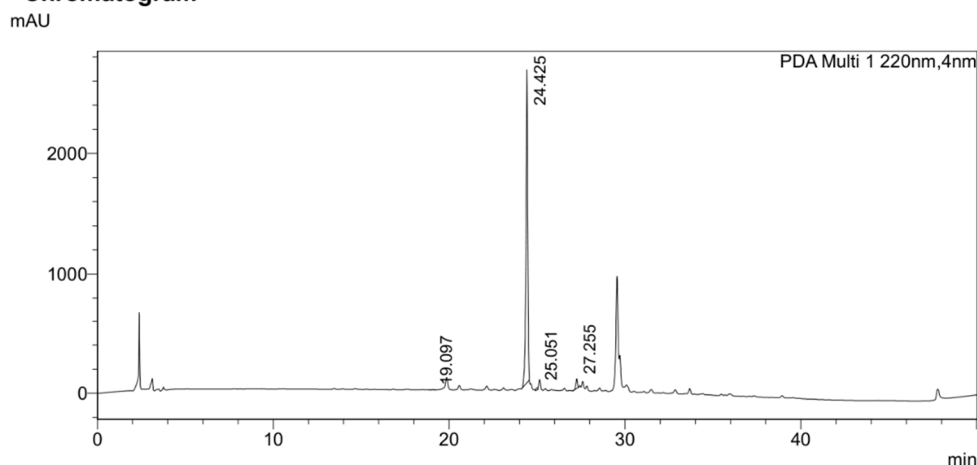

## <Peak Table>

PDA Ch1 220nm

| Peak# | Ret. Time | Area     | Height  | Conc. | Name |
|-------|-----------|----------|---------|-------|------|
| 1     | 19.097    | 23972    | 3461    | 0.017 | AP-4 |
| 2     | 24.425    | 18679647 | 2608079 | 3.297 | AP-1 |
| 3     | 25.051    | 148528   | 18344   | 0.422 | AP-3 |
| 4     | 27.255    | 458682   | 81431   | 0.253 | AP-2 |
| Total |           | 19310829 | 2711315 |       |      |

**Supplementary Figure S21:** HPLC analysis report of four different bioactive of *Andrographis paniculata* under ABA treatment (24h): where AP-1 is andrographolide and AP-2 is neo-andrographolide (AP-2), AP-3 is 14-deoxyandrographolide, and AP-4 is andrographolide glycoside.

## <Sample Information>

Sample Name : STD MIX  
Sample ID : CAL6  
Data Filename : 07-12-21AMIT006.lcd  
Method Filename : AMIT NM.lcm  
Batch Filename : amit.lcb  
Vial # : 1-29  
Injection Volume : 4 uL  
Date Acquired : 07-12-2021 23:33:59  
Date Processed : 03-01-2022 18:21:30

Sample Type : Standard  
Level : 6  
Acquired by : System Administrator  
Processed by : System Administrator

## <Chromatogram>

mAU

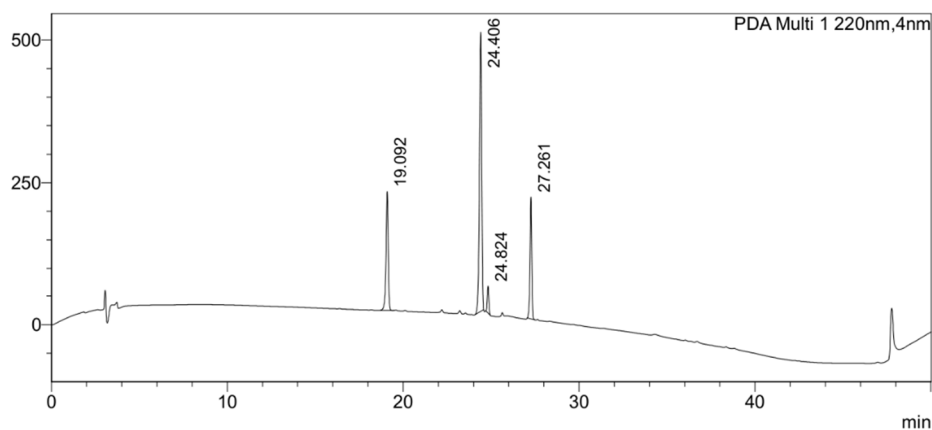

## <Peak Table>

PDA Ch1 220nm

| Peak# | Ret. Time | Area    | Height | Conc. | Name |
|-------|-----------|---------|--------|-------|------|
| 1     | 19.092    | 1804867 | 209594 | 0.801 | AP-4 |
| 2     | 24.406    | 4493540 | 490568 | 0.799 | AP-1 |
| 3     | 24.824    | 291446  | 48994  | 0.805 | AP-3 |
| 4     | 27.261    | 1455300 | 215327 | 0.794 | AP-2 |
| Total |           | 8045152 | 964483 |       |      |

**Supplementary Figure S22:** HPLC analysis report of four different standards from *Andrographis paniculata* used for quantification. where AP-1 is andrographolide and AP-2 is neo-andrographolide (AP-2), AP-3 is 14-deoxyandrographolide, and AP-4 is andrographolide glycoside.

## Tissue specific expression

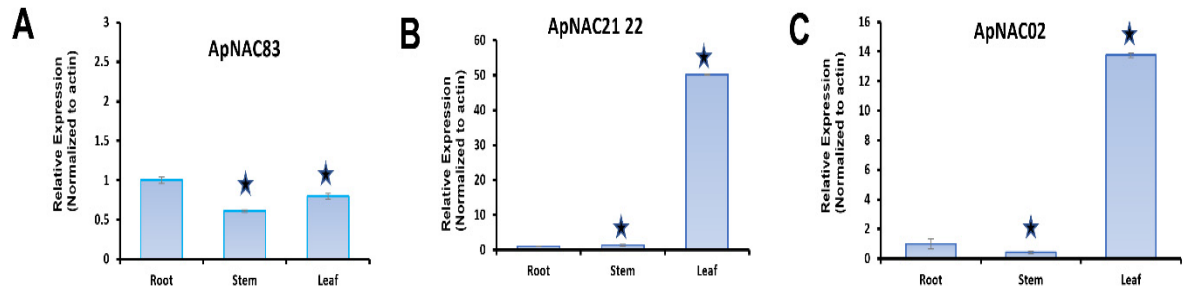

**Supplementary Figure S23:** Tissue-specific (root, stem, and leaves) relative expression of isolated genes: (A) *ApNAC83* (B) *ApNAC21 22*; (C) *ApNAC02*. Differences were scored as statistical significance at  $*P < 0.05$ . Asterisk symbols indicate significance.

### The relative expression of andrographolide pathway genes under ABA treatment

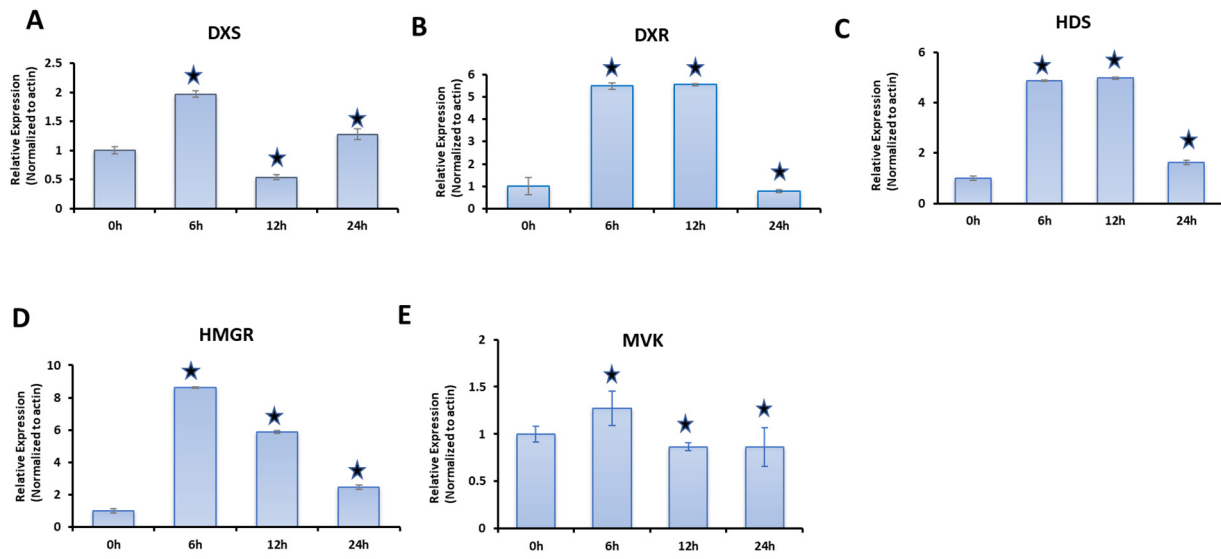

**Supplementary Figure S24:** Relative expression of andrographolide pathway related genes in response to ABA treatment at a different time interval (0h, 6h, 12h, and 24h). Differences were scored as statistical significance at  $*P < 0.05$ . Asterisk symbols indicate significance.



### The relative expression of andrographolide pathway genes under MeJA treatment

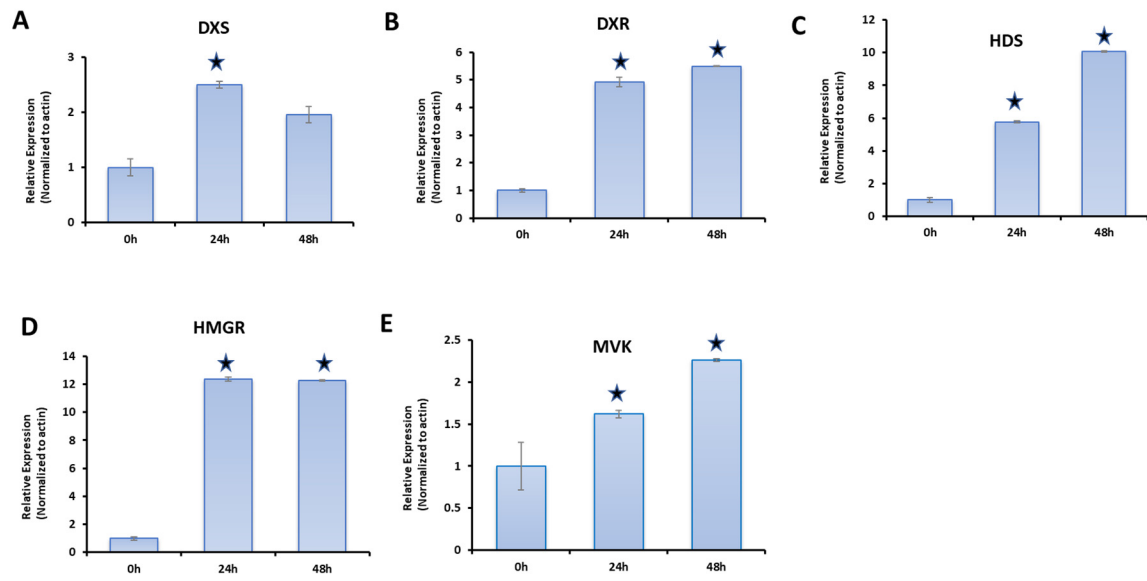

**Supplementary Figure S25:** Relative expression of andrographolide pathway related genes in response to MeJA treatment at a different time interval (0h, 24h, and 48h). Differences were scored as statistical significance at  $*P < 0.05$ . Asterisk symbols indicate significance.
