# Supplementary material for: Isolation, Characterization, and Expression Analysis of NAC Transcription Factor from Andrographis paniculata (Burm. f.) Nees and Their Role in Andrographolide Production
Source: Genes (Basel). 2024 Mar 28;15(4):422. doi: 10.3390/genes15040422 (PMC11049156; doi:10.3390/genes15040422)
Supplement: Supplementary file 1 [file genes-15-00422-s001.zip › Supplementary tables.xlsx]

## Sheet: Table S1
Supplementary Table 1: Primers used in the study.
S.No.	Gene	Primer ID	Primer Sequence (5'-3')	Application
1	ApNAC83	CoreN1F	ATGGAGTCGAGAGCCAAC	Core fragment amplification
2		CoreN1R	TCATTCCTGTTTGAAATCTCTGTGATCCC
3		3N1GSP	AGCAGCTGGGCAAGGATTTAGGCCAG	3' RACE
4		AP	GGCCACGCGTCGACTAGTACTTTTTTTTTTTTTTTTT
5		5N1GSP1OP	CTGTAGAACACTAGAGTCTTCTTCA	5' RACE
6		AUAP	GGCCACGCGTCGACTAGTAC
7		AAP	CUACUACUACUAGGCCACGCGTCGACTAGTACGGGIIGGGIIGGGIIG
8		5N1GSP2IP	ACTTCTCCTGCTCTGAACC
9		N1_qpcr1_F	AGGAAAATTGGGTCCTCTGC	Real time PCR Analysis
10		N1_qpcr1_R	TGAACCGGTCTTCTTGTTCC
11		N83F	TCTAGAATGGAGTCGAGAGCCAACCTTG	Transient expression
12		N83R	GAGCTCTCAGTCCTCTCCTTCATTCCTGT
15	ApNAC21 22	CoreN3F	ATGAGCTTGAGCAGCGTG	Core fragment amplification
16		CoreN3R	TTATCAACAATTCCTGCAGGC
17		3N3GSP	GATGGAAAACCGATTGGGTTATGCAC	3' RACE
18		5N3GSP1OP	GAATACCCTGCATAGCACCCAG	5' RACE
19		5N3GSP2IN	ATAGAACACCAGTGTCTTTCGCATTC
20		N3_qpcr1_F	CTGGGTGCTATGCAGGGTATTC	Real time PCR Analysis
21		N3_qpcr1_R	TTATCAACAATTCCTGCAGGC
22		N21MF	TCTAGAATGAGCTTGAGCAGCGTGGAGG	Transient expression
23		N21MR	GAGCTCCTAAATATTATCAACAATTCCT
26	ApNAC02	CoreN8F	ATGCACGAGTATCGCCTCG	Core fragment amplification
27		CoreN8R	TCAGCTTCGGCGTGCTC
28		3N8GSP	GATATACAACAAGAAGGGATCAATCGA	3' RACE
29		5N8GSP1OP	TCCGACGGGTCAAGATACAT	5' RACE
30		5N8GSP2IN	TCGATTGATCCCTTCTTGTTGTATATC
31		N8_qpcr1_F	ATGCACGAGTATCGCCTCG	Real time PCR Analysis
32		N8_qpcr1_R	TCAGCTTCGGCGTGCTC
33		N02TF	TCTAGAATGGCCGCCGCCGGAGAT	Transient expression
34		N02TR	GAGCTCTCAGCACTGCTTTGTAATAAAGGCT
37	ApActin	Actin F	AGGGACATCAAAGAGAAACTG	Real time PCR Analysis
38		Actin R	GCTGTGATCTCCTTGCTCATT
39	ApDXS	ApDXS-F	CTCTCTCCCCCTCGAGAAGT	Real time PCR Analysis
40		ApDXS-R	GTTTCACATGGTTGCCACTG
41	ApHMDS	ApHMDS-F	TGAAGCTCCGGAAGAAGAGA
42		ApHMDS-R	AACAGGCAATTGACCACTCC
43	ApDXR	ApDXR-F	TAGCAGTAGAAGCCCCAACC
44		ApDXR-R	CCACAAAGCGCTCTCTCTCT
45	ApHMGR	ApHMGR-F	ACAATCGGTCGCAGAAGAAC
46		ApHMGR-R	GGGATTCCAGCCAAAGAACT
47	ApMVK	ApMVK-F	CGGAGGAGGCTGTGTTCTAA
48		ApMVK-R	TTAGGAAGACCCGAAGCTGA
49	NtHMGR2	NtHMGR2-F	AGGTGGCGTGAGAAAATCAG
50		NtHMGR2-R	TATCCCTGGAAACGAACGAC
51	NtActin	NtActin-F	CCATTCTTCGTTTGGACCTT
52		NtActin-R	TTCTGGGCAACGGAACCT

## Sheet: Table S2
Supplementary Table 2: Comparative physicochemical parameters of isolated NAC genes.
S.No.	Physicochemical parameters	ApNAC83	ApNAC21 22	ApNAC02
1	Length (total no. of amino acids)	228	256	279
2	Molecular weight (MW)	25.59 kDa	29.16 kDa	31.04 kDa
3	Iso-electric point (PI)	9.35	8.95	7.01
4	Instability index (II)	45.11	50.67	44.43
5	Aliphatic index (AI)	61.14	60.94	66.56
6	Grand average of hydropathicity (GRAVY)	-0.778	-0.589	-0.498

## Sheet: Table S3
Supplementary Table 3: List of SSRs, SSR start site, SSR end site, and region where SSR detected in the full length of isolated NAC genes.
Gene	Start SSR	End SSR	Type	Repeat motifs	Region where SSR detected
ApNAC83	13	47	di	(CT)17	5’UTR
	93	102	tri	(TAA)3	5’UTR
	142	151	tri	(TGA)3	5’UTR
	185	191	mono	(G)6	5’UTR
	453	459	mono	(T)6	CDS
	682	691	tri	(CAG)3	CDS
	771	783	tri	(TGC)4	CDS
ApNAC21 22	79	85	di	(TC)3	5’UTR
	115	133	di	(CA)9	5’UTR
	137	149	di	(TA)6	5’UTR
	150	158	di	(GT)4	5’UTR
	159	167	di	(TA)4	5’UTR
	395	401	di	(GA)3	CDS
	402	408	mono	(A)6	CDS
	665	671	di	(GA)3	CDS
	957	981	tri	(AAT)8	3' UTR
ApNAC02	21	33	tetra	(TCAC)3	5’ UTR
	53	62	tri	(GCC)3	CDS
	252	258	di	(TC)3	CDS
	259	265	di	(GA)3	CDS
	561	570	tri	(CGC)3	CDS
	775	784	tri	(CGG)3	CDS
	795	813	di	(CGG)6	CDS
	955	963	mono	(C)8	3' UTR

## Sheet: Table S4
Supplementary Table 4. Cis-actin regulatory DNA elements, organism, signal sequence, and reported putative functions identified in the promoter region of isolated NAC genes.
Gene Name	Site Name	Organism	Strand Matrix	Signal sequence	Putative function
ApNAC83	ABRE	Arabidopsis thaliana	+	ACGTG	cis-acting element involved in the abscisic acid responsiveness
	ABRE3a	Zea mays	+	TACGTG	cis-acting element involved in the abscisic acid responsiveness
	ABRE4	Zea mays	-	CACGTA	cis-acting element involved in the abscisic acid responsiveness
	ARE	Zea mays	-	AAACCA	cis-acting regulatory element essential for the anaerobic induction
	CAAT-box	Nicotiana glutinosa	-	CAAT	common cis-acting element in promoter and enhancer regions
	CAAT-box	Pisum sativum	+	CAAAT	common cis-acting element in promoter and enhancer regions
	CAAT-box	Nicotiana glutinosa	+	CAAT	common cis-acting element in promoter and enhancer regions
	G-box	Arabidopsis thaliana	+	TACGTG	cis-acting regulatory element involved in light responsiveness
	STRE	Arabidopsis thaliana	-	AGGGG	Stress Responsive Element
	STRE	Arabidopsis thaliana	+	AGGGG	Stress Responsive Element
	STRE	Arabidopsis thaliana	+	AGGGG	Stress Responsive Element
	TATA-box	Arabidopsis thaliana	-	TATA	core promoter element around -30 of transcription start
	W box	Arabidopsis thaliana	+	TTGACC	transcription repressor of gibberellin signaling pathway
ApNAC2122	AT~TATA-box	Arabidopsis thaliana	-	TATATA	core promoter element around -30 of transcription start
	AT~TATA-box	Arabidopsis thaliana	-	TATATA	core promoter element around -30 of transcription start
	AT~TATA-box	Arabidopsis thaliana	-	TATATA	core promoter element around -30 of transcription start
	AT~TATA-box	Arabidopsis thaliana	-	TATATA	core promoter element around -30 of transcription start
	AT~TATA-box	Arabidopsis thaliana	-	TATATA	core promoter element around -30 of transcription start
	AT~TATA-box	Arabidopsis thaliana	-	TATATA	core promoter element around -30 of transcription start
	AT~TATA-box	Arabidopsis thaliana	-	TATATA	core promoter element around -30 of transcription start
	CAAT-box	Nicotiana glutinosa	-	CAAT	core promoter element around -30 of transcription start
	CAAT-box	Nicotiana glutinosa	+	CAAT	core promoter element around -30 of transcription start
	G-box	Zea mays	+	CACGAC	cis-acting regulatory element involved in light responsiveness
	GT1-motif	Solanum tuberosum	-	GTGTGTGAA	light-responsive element
	MSA-like	Catharanthus roseus	+	TCAAACGGT	cis-acting element involved in cell cycle regulation
	STRE	Arabidopsis thaliana	-	AGGGG	Stress-responsive element
	TATA-box	Brassica napus	+	ATTATA	core promoter element around -30 of transcription start
	TATA-box	Brassica napus	-	ATATAT	core promoter element around -30 of transcription start
	TATA-box	Arabidopsis thaliana	-	TATATA	core promoter element around -30 of transcription start
	TATA-box	Brassica napus	-	ATATAT	core promoter element around -30 of transcription start
	TATA-box	Arabidopsis thaliana	-	TATATA	core promoter element around -30 of transcription start
	TATA-box	Brassica napus	-	ATATAT	core promoter element around -30 of transcription start
	TATA-box	Brassica napus	-	ATATAT	core promoter element around -30 of transcription start
	TATA-box	Arabidopsis thaliana	-	TATA	core promoter element around -30 of transcription start
	TATA-box	Arabidopsis thaliana	+	TATA	core promoter element around -30 of transcription start
	TATA-box	Helianthus annuus	-	TATACA	core promoter element around -30 of transcription start
	TATA-box	Brassica napus	-	ATATAT	core promoter element around -30 of transcription start
	TATA-box	Arabidopsis thaliana	-	TATATA	core promoter element around -30 of transcription start
	TATA-box	Brassica napus	-	ATATAT	core promoter element around -30 of transcription start
	TATA-box	Arabidopsis thaliana	-	TATATA	core promoter element around -30 of transcription start
	TATA-box	Arabidopsis thaliana	-	TATATA	core promoter element around -30 of transcription start
	TATA-box	Arabidopsis thaliana	-	TATA	core promoter element around -30 of transcription start
	TATA-box	Arabidopsis thaliana	-	TATAA	core promoter element around -30 of transcription start
	TATA-box	Arabidopsis thaliana	-	TATATA	core promoter element around -30 of transcription start
	TATA-box	Arabidopsis thaliana	-	TATATA	core promoter element around -30 of transcription start
	TCCC-motif	Spinacia oleracea	+	TCTCCCT	part of a light-responsive element
	TCCC-motif	Spinacia oleracea	+	TCTCCCT	part of a light-responsive element
ApNAC02	GC-motif	Zea mays	+	CCCCCG	Enhancer-like element involved in anoxic specific inducibility
	DRE2COREZMRAB17	Zea mays	+	ACCGAC	Drought responsive element

## Sheet: Table S5
Supplementary Table 5: Correlation between the expression of isolated NACs and key metabolites biosynthesis under ABA treatment.
Metabolites/NACs	ApNAC83	ApNAC21 22	ApNAC02
Andrographolide	-0.0928157	-0.43997	0.504322
neo andrographolidey	-0.0763851	0.341581	-0.543285
14-deoxyandrographolidex	-0.860842	-0.919557	-0.461596
andrographolide glycosidey	0.714603	-0.0311002	-0.44549

## Sheet: Table S6
Supplementary Table 6: Cis acting regulatory elements predicted in promoter region of ApHMGR gene
Site Name	Organism	Position	Strand	Matrix score	sequence	function
ABRE	Arabidopsis thaliana	1139	+	5	ACGTG	cis-acting element involved in the abscisic acid responsiveness
ABRE	Arabidopsis thaliana	952	+	5	ACGTG	cis-acting element involved in the abscisic acid responsiveness
ABRE	Arabidopsis thaliana	882	+	5	ACGTG	cis-acting element involved in the abscisic acid responsiveness
ABRE3a	Zea mays	1138	+	6	TACGTG
ABRE4	Zea mays	1138	-	6	CACGTA
ACE	Petroselinum crispum	1136	-	9	GACACGTATG	cis-acting element involved in light responsiveness
ARE	Zea mays	178	-	6	AAACCA	cis-acting regulatory element essential for the anaerobic induction
ARE	Zea mays	1746	+	6	AAACCA	cis-acting regulatory element essential for the anaerobic induction
ARE	Zea mays	474	-	6	AAACCA	cis-acting regulatory element essential for the anaerobic induction
ATCT-motif	Pisum sativum	1025	-	9	AATCTAATCC	part of a conserved DNA module involved in light responsiveness
ATCT-motif	Pisum sativum	1290	+	9	AATCTAATCC	part of a conserved DNA module involved in light responsiveness
AT~TATA-box	Arabidopsis thaliana	873	-	8	TATATAAA
AT~TATA-box	Arabidopsis thaliana	633	+	6	TATATA
AT~TATA-box	Arabidopsis thaliana	547	+	6	TATATA
AT~TATA-box	Arabidopsis thaliana	1008	-	6	TATATA
AT~TATA-box	Arabidopsis thaliana	875	+	6	TATATA
AT~TATA-box	Arabidopsis thaliana	501	+	6	TATATA
AT~TATA-box	Arabidopsis thaliana	499	-	8	TATATAAA
AT~TATA-box	Arabidopsis thaliana	59	+	6	TATATA
AT~TATA-box	Arabidopsis thaliana	1934	-	6	TATATA
AT~TATA-box	Arabidopsis thaliana	1958	-	6	TATATA
AT~TATA-box	Arabidopsis thaliana	1956	-	6	TATATA
AT~TATA-box	Arabidopsis thaliana	1938	-	6	TATATA
AT~TATA-box	Arabidopsis thaliana	1936	-	6	TATATA
AT~TATA-box	Arabidopsis thaliana	1473	-	6	TATATA
AT~TATA-box	Arabidopsis thaliana	1205	-	6	TATATA
AT~TATA-box	Arabidopsis thaliana	1207	-	6	TATATA
Box 4	Petroselinum crispum	77	+	6	ATTAAT	part of a conserved DNA module involved in light responsiveness
Box 4	Petroselinum crispum	1574	-	6	ATTAAT	part of a conserved DNA module involved in light responsiveness
Box 4	Petroselinum crispum	1769	-	6	ATTAAT	part of a conserved DNA module involved in light responsiveness
Box 4	Petroselinum crispum	965	+	6	ATTAAT	part of a conserved DNA module involved in light responsiveness
CAAT-box	Arabidopsis thaliana	1626	+	5	CCAAT	common cis-acting element in promoter and enhancer regions
CAAT-box	Nicotiana glutinosa	1532	+	4	CAAT
CAAT-box	Nicotiana glutinosa	1875	+	4	CAAT
CAAT-box	Nicotiana glutinosa	587	+	4	CAAT
CAAT-box	Arabidopsis thaliana	171	+	5	CCAAT	common cis-acting element in promoter and enhancer regions
CAAT-box	Nicotiana glutinosa	1627	+	4	CAAT
CAAT-box	Nicotiana glutinosa	1659	-	4	CAAT
CAAT-box	Arabidopsis thaliana	373	-	5	CCAAT	common cis-acting element in promoter and enhancer regions
CAAT-box	Nicotiana glutinosa	1504	-	4	CAAT
CAAT-box	Nicotiana glutinosa	1694	+	4	CAAT
CAAT-box	Nicotiana glutinosa	1716	+	4	CAAT
CAAT-box	Nicotiana glutinosa	943	-	4	CAAT
CAAT-box	Nicotiana glutinosa	38	-	4	CAAT
CAAT-box	Nicotiana glutinosa	963	+	4	CAAT
CAAT-box	Nicotiana glutinosa	810	+	4	CAAT
CAAT-box	Nicotiana glutinosa	784	+	4	CAAT
CAAT-box	Nicotiana glutinosa	172	+	4	CAAT
CAAT-box	Nicotiana glutinosa	834	-	4	CAAT
CAAT-box	Nicotiana glutinosa	1479	+	4	CAAT
CAAT-box	Nicotiana glutinosa	768	-	4	CAAT
CAAT-box	Nicotiana glutinosa	568	-	4	CAAT
CAAT-box	Nicotiana glutinosa	459	-	4	CAAT
CAAT-box	Nicotiana glutinosa	102	+	4	CAAT
CAAT-box	Nicotiana glutinosa	350	+	4	CAAT
CAAT-box	Pisum sativum	1733	-	5	CAAAT	common cis-acting element in promoter and enhancer regions
CAAT-box	Nicotiana glutinosa	1752	+	4	CAAT
CAAT-box	Arabidopsis thaliana	1874	+	5	CCAAT	common cis-acting element in promoter and enhancer regions
CAAT-box	Arabidopsis thaliana	349	+	5	CCAAT	common cis-acting element in promoter and enhancer regions
CAAT-box	Nicotiana glutinosa	1756	+	4	CAAT
CAAT-box	Nicotiana glutinosa	242	+	4	CAAT
CAAT-box	Nicotiana glutinosa	266	+	4	CAAT
CAAT-box	Nicotiana glutinosa	275	+	4	CAAT
CAAT-box	Pisum sativum	1647	+	5	CAAAT	common cis-acting element in promoter and enhancer regions
CAAT-box	Nicotiana glutinosa	1276	-	4	CAAT
CAAT-box	Nicotiana glutinosa	1381	+	4	CAAT
CAAT-box	Pisum sativum	615	-	5	CAAAT	common cis-acting element in promoter and enhancer regions
CAAT-box	Nicotiana glutinosa	412	+	4	CAAT
CAAT-box	Nicotiana glutinosa	427	-	4	CAAT
CAAT-box	Nicotiana glutinosa	425	+	4	CAAT
CAAT-box	Pisum sativum	1656	+	5	CAAAT	common cis-acting element in promoter and enhancer regions
CAAT-box	Pisum sativum	134	+	5	CAAAT	common cis-acting element in promoter and enhancer regions
CAAT-box	Nicotiana glutinosa	233	-	4	CAAT
CAAT-box	Nicotiana glutinosa	198	-	4	CAAT
CAAT-box	Pisum sativum	1080	+	5	CAAAT	common cis-acting element in promoter and enhancer regions
CAAT-box	Nicotiana glutinosa	237	-	4	CAAT
CAAT-box	Pisum sativum	693	+	5	CAAAT	common cis-acting element in promoter and enhancer regions
CAAT-box	Nicotiana glutinosa	1071	+	4	CAAT
CAAT-box	Arabidopsis thaliana	1022	-	5	CCAAT	common cis-acting element in promoter and enhancer regions
CAAT-box	Pisum sativum	1407	+	5	CAAAT	common cis-acting element in promoter and enhancer regions
CAAT-box	Pisum sativum	1418	+	5	CAAAT	common cis-acting element in promoter and enhancer regions
CAAT-box	Pisum sativum	1114	-	5	CAAAT	common cis-acting element in promoter and enhancer regions
CAAT-box	Pisum sativum	1101	+	5	CAAAT	common cis-acting element in promoter and enhancer regions
CAAT-box	Pisum sativum	1253	+	5	CAAAT	common cis-acting element in promoter and enhancer regions
CGTCA-motif	Hordeum vulgare	802	+	5	CGTCA	cis-acting regulatory element involved in the MeJA-responsiveness
ERE	Nicotiana glutinos	977	+	8	ATTTTAAA
G-Box	Pisum sativum	951	-	6	CACGTT	cis-acting regulatory element involved in light responsiveness
G-box	Zea mays	881	-	6	CACGTC	cis-acting regulatory element involved in light responsiveness
G-box	Arabidopsis thaliana	1138	+	6	TACGTG	cis-acting regulatory element involved in light responsiveness
GA-motif	Arabidopsis thaliana	1037	+	8	ATAGATAA	part of a light responsive element
GA-motif	Arabidopsis thaliana	916	-	8	ATAGATAA	part of a light responsive element
GT1-motif	Arabidopsis thaliana	1622	-	6	GGTTAA	light responsive element
GT1-motif	Avena sativa	1621	-	7	GGTTAAT	light responsive element
GT1-motif	Arabidopsis thaliana	1059	+	6	GGTTAA	light responsive element
GT1-motif	Arabidopsis thaliana	439	-	6	GGTTAA	light responsive element
I-box	Zea mays	1059	+	9	gGATAAGGTG	part of a light responsive element
MBS	Arabidopsis thaliana	814	-	6	CAACTG	MYB binding site involved in drought-inducibility
MYB	Arabidopsis thaliana	1623	+	6	TAACCA
MYB	Arabidopsis thaliana	1058	-	6	TAACCA
MYB	Arabidopsis thaliana	440	+	6	TAACCA
MYB	Arabidopsis thaliana	303	-	6	CAACCA
MYB-like sequence	Arabidopsis thaliana	1623	+	6	TAACCA
MYB-like sequence	Arabidopsis thaliana	440	+	6	TAACCA
MYB-like sequence	Arabidopsis thaliana	1058	-	6	TAACCA
MYC	Arabidopsis thaliana	1085	+	6	CATGTG	MYC/NAC binding site (New Place ID- S000413)
MYC	Arabidopsis thaliana	425	+	6	CAATTG
Myb	Arabidopsis thaliana	1599	-	6	TAACTG
Myb	Arabidopsis thaliana	814	-	6	CAACTG
Myc	Arabidopsis thaliana	453	-	7	TCTCTTA
Myc	Arabidopsis thaliana	1988	-	7	TCTCTTA
STRE	Arabidopsis thaliana	1228	-	5	AGGGG
STRE	Arabidopsis thaliana	120	-	5	AGGGG
TATA	Arabidopsis thaliana	1032	-	8	TATAAAAT
TATA-box	Arabidopsis thaliana	874	-	7	TATATAA	core promoter element around -30 of transcription start
TATA-box	Arabidopsis thaliana	1960	-	4	TATA	core promoter element around -30 of transcription start
TATA-box	Helianthus annuus	873	-	6	TATAAA	core promoter element around -30 of transcription start
TATA-box	Arabidopsis thaliana	754	+	4	TATA	core promoter element around -30 of transcription start
TATA-box	Arabidopsis thaliana	1010	-	4	TATA	core promoter element around -30 of transcription start
TATA-box	Brassica napus	1007	-	6	ATATAT	core promoter element around -30 of transcription start
TATA-box	Arabidopsis thaliana	1000	-	4	TATA	core promoter element around -30 of transcription start
TATA-box	Brassica napus	1009	-	6	ATATAT	core promoter element around -30 of transcription start
TATA-box	Arabidopsis thaliana	1008	-	6	TATATA	core promoter element around -30 of transcription start
TATA-box	Arabidopsis thaliana	710	-	8	TATTTAAA	core promoter element around -30 of transcription start
TATA-box	Helianthus annuus	1944	-	6	TATACA	core promoter element around -30 of transcription start
TATA-box	Arabidopsis thaliana	1936	-	6	TATATA	core promoter element around -30 of transcription start
TATA-box	Arabidopsis thaliana	1958	-	6	TATATA	core promoter element around -30 of transcription start
TATA-box	Brassica napus	1935	-	6	ATATAT	core promoter element around -30 of transcription start
TATA-box	Arabidopsis thaliana	1556	-	4	TATA	core promoter element around -30 of transcription start
TATA-box	Arabidopsis thaliana	1719	-	8	TATTTAAA	core promoter element around -30 of transcription start
TATA-box	Arabidopsis thaliana	1642	-	4	TATA	core promoter element around -30 of transcription start
TATA-box	Arabidopsis thaliana	1934	-	6	TATATA	core promoter element around -30 of transcription start
TATA-box	Arabidopsis thaliana	1956	-	6	TATATA	core promoter element around -30 of transcription start
TATA-box	Brassica napus	1933	-	6	ATATAT	core promoter element around -30 of transcription start
TATA-box	Brassica napus	1555	-	6	ATATAT	core promoter element around -30 of transcription start
TATA-box	Arabidopsis thaliana	1207	-	6	TATATA	core promoter element around -30 of transcription start
TATA-box	Arabidopsis thaliana	1475	-	4	TATA	core promoter element around -30 of transcription start
TATA-box	Brassica napus	1204	-	6	ATATAT	core promoter element around -30 of transcription start
TATA-box	Brassica napus	1957	-	6	ATATAT	core promoter element around -30 of transcription start
TATA-box	Arabidopsis thaliana	1938	-	6	TATATA	core promoter element around -30 of transcription start
TATA-box	Arabidopsis thaliana	1940	-	4	TATA	core promoter element around -30 of transcription start
TATA-box	Brassica napus	1939	-	6	ATATAT	core promoter element around -30 of transcription start
TATA-box	Arabidopsis thaliana	1473	-	6	TATATA	core promoter element around -30 of transcription start
TATA-box	Brassica napus	1937	-	6	ATATAT	core promoter element around -30 of transcription start
TATA-box	Arabidopsis thaliana	1232	-	4	TATA	core promoter element around -30 of transcription start
TATA-box	Arabidopsis thaliana	1946	-	4	TATA	core promoter element around -30 of transcription start
TATA-box	Arabidopsis thaliana	1215	-	4	TATA	core promoter element around -30 of transcription start
TATA-box	Arabidopsis thaliana	1209	-	4	TATA	core promoter element around -30 of transcription start
TATA-box	Brassica oleracea	1208	+	6	ATATAA	core promoter element around -30 of transcription start
TATA-box	Helianthus annuus	1157	-	6	TATAAA	core promoter element around -30 of transcription start
TATA-box	Arabidopsis thaliana	1190	-	4	TATA	core promoter element around -30 of transcription start
TATA-box	Oryza sativa	1568	-	7	TACAAAA	core promoter element around -30 of transcription start
TATA-box	Arabidopsis thaliana	1153	-	4	TATA	core promoter element around -30 of transcription start
TATA-box	Avena sativa	1206	-	12	TATATTTATATTT	core promoter element around -30 of transcription start
TATA-box	Arabidopsis thaliana	1158	-	5	TATAA	core promoter element around -30 of transcription start
TATA-box	Arabidopsis thaliana	1189	-	5	TATAA	core promoter element around -30 of transcription start
TATA-box	Brassica napus	1188	+	6	ATTATA	core promoter element around -30 of transcription start
TATA-box	Arabidopsis thaliana	1178	-	4	TATA	core promoter element around -30 of transcription start
TATA-box	Brassica juncea	1156	-	7	TATAAAT	core promoter element around -30 of transcription start
TATA-box	Arabidopsis thaliana	1205	-	6	TATATA	core promoter element around -30 of transcription start
TATA-box	Brassica napus	1177	-	6	ATATAT	core promoter element around -30 of transcription start
TATA-box	Arabidopsis thaliana	1173	-	4	TATA	core promoter element around -30 of transcription start
TATA-box	Arabidopsis thaliana	1159	-	4	TATA	core promoter element around -30 of transcription start
TATA-box	Daucus carota	1155	-	8	TATAAATA	core promoter element around -30 of transcription start
TATA-box	Arabidopsis thaliana	1035	-	5	TATAA	core promoter element around -30 of transcription start
TATA-box	Arabidopsis thaliana	1036	-	4	TATA	core promoter element around -30 of transcription start
TATA-box	Helianthus annuus	1034	-	6	TATAAA	core promoter element around -30 of transcription start
TATA-box	Brassica napus	1152	-	6	ATATAT	core promoter element around -30 of transcription start
TATA-box	Pisum sativum	1033	-	7	TATAAAA	core promoter element around -30 of transcription start
TATA-box	Arabidopsis thaliana	999	-	5	TATAA	core promoter element around -30 of transcription start
TATA-box	Brassica oleracea	753	+	6	ATATAA	core promoter element around -30 of transcription start
TATA-box	Brassica napus	998	+	6	ATTATA	core promoter element around -30 of transcription start
TATA-box	Arabidopsis thaliana	736	+	4	TATA	core promoter element around -30 of transcription start
TATA-box	Arabidopsis thaliana	921	+	4	TATA	core promoter element around -30 of transcription start
TATA-box	Arabidopsis thaliana	899	-	5	TATAA	core promoter element around -30 of transcription start
TATA-box	Arabidopsis thaliana	877	+	4	TATA	core promoter element around -30 of transcription start
TATA-box	Arabidopsis thaliana	875	+	6	TATATA	core promoter element around -30 of transcription start
TATA-box	Arabidopsis thaliana	900	+	4	TATA	core promoter element around -30 of transcription start
TATA-box	Arabidopsis thaliana	716	+	4	TATA	core promoter element around -30 of transcription start
TATA-box	Arabidopsis thaliana	635	+	4	TATA	core promoter element around -30 of transcription start
TATA-box	Arabidopsis thaliana	633	+	6	TATATA	core promoter element around -30 of transcription start
TATA-box	Brassica napus	632	+	6	ATATAT	core promoter element around -30 of transcription start
TATA-box	Arabidopsis thaliana	317	-	5	TATAA	core promoter element around -30 of transcription start
TATA-box	Arabidopsis thaliana	624	+	4	TATA	core promoter element around -30 of transcription start
TATA-box	Arabidopsis thaliana	318	+	4	TATA	core promoter element around -30 of transcription start
TATA-box	Arabidopsis thaliana	34	-	5	TATAA	core promoter element around -30 of transcription start
TATA-box	Brassica napus	316	+	6	ATTATA	core promoter element around -30 of transcription start
TATA-box	Pisum sativum	872	-	7	TATAAAA	core promoter element around -30 of transcription start
TATA-box	Arabidopsis thaliana	82	+	4	TATA	core promoter element around -30 of transcription start
TATA-box	Brassica napus	81	+	6	ATATAT	core promoter element around -30 of transcription start
TATA-box	Arabidopsis thaliana	623	-	5	TATAA	core promoter element around -30 of transcription start
TATA-box	Arabidopsis thaliana	61	+	4	TATA	core promoter element around -30 of transcription start
TATA-box	Brassica napus	622	+	6	ATTATA	core promoter element around -30 of transcription start
TATA-box	Brassica napus	546	+	6	ATATAT	core promoter element around -30 of transcription start
TATA-box	Brassica napus	58	+	6	ATATAT	core promoter element around -30 of transcription start
TATA-box	Brassica napus	60	+	6	ATATAT	core promoter element around -30 of transcription start
TATA-box	Arabidopsis thaliana	35	+	4	TATA	core promoter element around -30 of transcription start
TATA-box	Arabidopsis thaliana	59	+	6	TATATA	core promoter element around -30 of transcription start
TATA-box	Arabidopsis thaliana	547	+	6	TATATA	core promoter element around -30 of transcription start
TATA-box	Arabidopsis thaliana	549	+	4	TATA	core promoter element around -30 of transcription start
TATA-box	Brassica napus	33	+	6	ATTATA	core promoter element around -30 of transcription start
TATA-box	Brassica oleracea	548	+	6	ATATAA	core promoter element around -30 of transcription start
TATA-box	Arabidopsis thaliana	503	+	4	TATA	core promoter element around -30 of transcription start
TATA-box	Arabidopsis thaliana	500	-	7	TATATAA	core promoter element around -30 of transcription start
TATA-box	Arabidopsis thaliana	501	+	6	TATATA	core promoter element around -30 of transcription start
TATA-box	Helianthus annuus	499	-	6	TATAAA	core promoter element around -30 of transcription start
TATA-box	Oryza sativa	418	+	7	TACAAAA	core promoter element around -30 of transcription start
TATA-box	Lycopersicon esculentum	498	-	9	taTATAAAg	core promoter element around -30 of transcription start
TATC-box	Oryza sativa	217	-	7	TATCCCA	cis-acting element involved in gibberellin-responsiveness
TCA	Pisum sativum	795	+	9	TCATCTTCAT
TCT-motif	Arabidopsis thaliana	670	+	6	TCTTAC	part of a light responsive element
TCT-motif	Arabidopsis thaliana	1987	-	6	TCTTAC	part of a light responsive element
TGACG-motif	Hordeum vulgare	802	-	5	TGACG	cis-acting regulatory element involved in the MeJA-responsivenes
W box	Arabidopsis thaliana	1250	-	6	TTGACC
W box	Arabidopsis thaliana	1116	+	6	TTGACC
W box	Arabidopsis thaliana	1123	-	6	TTGACC
as-1	Arabidopsis thaliana	802	-	5	TGACG

## Sheet: Table S7
Supplementary Table 7: Cis acting regulatory elements predicted in promoter region of NtHMGR gene
Site Name	Organism	Position	Strand	Matrix score	sequence	function
AAGAA-motif	Avena sativa	1214	-	7	GAAAGAA
ABRE	Arabidopsis thaliana	572	+	5	ACGTG	cis-acting element involved in the abscisic acid responsiveness
ARE	Zea mays	725	-	6	AAACCA	cis-acting regulatory element essential for the anaerobic induction
ARE	Zea mays	1910	-	6	AAACCA	cis-acting regulatory element essential for the anaerobic induction
ARE	Zea mays	1002	-	6	AAACCA	cis-acting regulatory element essential for the anaerobic induction
AT~TATA-box	Arabidopsis thaliana	1694	-	6	TATATA
Box 4	Petroselinum crispum	1556	-	6	ATTAAT	part of a conserved DNA module involved in light responsiveness
CAAT-box	Nicotiana glutinosa	143	+	4	CAAT
CAAT-box	Pisum sativum	190	-	5	CAAAT	common cis-acting element in promoter and enhancer regions
CAAT-box	Pisum sativum	238	-	5	CAAAT	common cis-acting element in promoter and enhancer regions
CAAT-box	Pisum sativum	283	-	5	CAAAT	common cis-acting element in promoter and enhancer regions
CAAT-box	Pisum sativum	322	-	5	CAAAT	common cis-acting element in promoter and enhancer regions
CAAT-box	Pisum sativum	379	+	5	CAAAT	common cis-acting element in promoter and enhancer regions
CAAT-box	Nicotiana glutinosa	423	-	4	CAAT
CAAT-box	Nicotiana glutinosa	456	-	4	CAAT
CAAT-box	Nicotiana glutinosa	467	-	4	CAAT
CAAT-box	Pisum sativum	546	-	5	CAAAT	common cis-acting element in promoter and enhancer regions
CAAT-box	Pisum sativum	567	-	5	CAAAT	common cis-acting element in promoter and enhancer regions
CAAT-box	Pisum sativum	673	-	5	CAAAT	common cis-acting element in promoter and enhancer regions
CAAT-box	Pisum sativum	775	-	5	CAAAT	common cis-acting element in promoter and enhancer regions
CAAT-box	Nicotiana glutinosa	793	-	4	CAAT
CAAT-box	Pisum sativum	834	+	5	CAAAT	common cis-acting element in promoter and enhancer regions
CAAT-box	Pisum sativum	899	+	5	CAAAT	common cis-acting element in promoter and enhancer regions
CAAT-box	Pisum sativum	934	+	5	CAAAT	common cis-acting element in promoter and enhancer regions
CAAT-box	Pisum sativum	955	-	5	CAAAT	common cis-acting element in promoter and enhancer regions
CAAT-box	Arabidopsis thaliana	963	-	5	CCAAT	common cis-acting element in promoter and enhancer regions
CAAT-box	Pisum sativum	989	-	5	CAAAT	common cis-acting element in promoter and enhancer regions
CAAT-box	Pisum sativum	998	+	5	CAAAT	common cis-acting element in promoter and enhancer regions
CAAT-box	Pisum sativum	1010	-	5	CAAAT	common cis-acting element in promoter and enhancer regions
CAAT-box	Pisum sativum	1044	-	5	CAAAT	common cis-acting element in promoter and enhancer regions
CAAT-box	Arabidopsis thaliana	1128	+	8	CCCAATTT	common cis-acting element in promoter and enhancer regions
CAAT-box	Arabidopsis thaliana	1129	+	5	CCAAT	common cis-acting element in promoter and enhancer regions
CAAT-box	Nicotiana glutinosa	1130	+	4	CAAT
CAAT-box	Nicotiana glutinosa	1158	+	4	CAAT
CAAT-box	Pisum sativum	1184	+	5	CAAAT	common cis-acting element in promoter and enhancer regions
CAAT-box	Nicotiana glutinosa	1220	+	4	CAAT
CAAT-box	Nicotiana glutinosa	1271	-	4	CAAT
CAAT-box	Arabidopsis thaliana	1279	-	5	CCAAT	common cis-acting element in promoter and enhancer regions
CAAT-box	Pisum sativum	1315	-	5	CAAAT	common cis-acting element in promoter and enhancer regions
CAAT-box	Nicotiana glutinosa	1370	+	4	CAAT
CAAT-box	Pisum sativum	1396	+	5	CAAAT	common cis-acting element in promoter and enhancer regions
CAAT-box	Pisum sativum	1401	-	5	CAAAT	common cis-acting element in promoter and enhancer regions
CAAT-box	Petunia hybrida	1480	-	7	TGCCAAC	common cis-acting element in promoter and enhancer regions
CAAT-box	Pisum sativum	1678	-	5	CAAAT	common cis-acting element in promoter and enhancer regions
CAAT-box	Arabidopsis thaliana	1689	-	5	CCAAT	common cis-acting element in promoter and enhancer regions
CAAT-box	Arabidopsis thaliana	1726	+	5	CCAAT	common cis-acting element in promoter and enhancer regions
CAAT-box	Nicotiana glutinosa	1727	+	4	CAAT
CAAT-box	Pisum sativum	1779	-	5	CAAAT	common cis-acting element in promoter and enhancer regions
CAAT-box	Pisum sativum	1784	+	5	CAAAT	common cis-acting element in promoter and enhancer regions
CAAT-box	Nicotiana glutinosa	1811	+	4	CAAT
CAAT-box	Pisum sativum	1839	+	5	CAAAT	common cis-acting element in promoter and enhancer regions
CAAT-box	Arabidopsis thaliana	1869	+	5	CCAAT	common cis-acting element in promoter and enhancer regions
CAAT-box	Nicotiana glutinosa	1870	+	4	CAAT
CAAT-box	Nicotiana glutinosa	1894	+	4	CAAT
CGTCA-motif	Hordeum vulgare	51	-	5	CGTCA	cis-acting regulatory element involved in the MeJA-responsiveness
CGTCA-motif	Hordeum vulgare	570	-	5	CGTCA	cis-acting regulatory element involved in the MeJA-responsiveness
CGTCA-motif	Hordeum vulgare	325	-	5	CGTCA	cis-acting regulatory element involved in the MeJA-responsiveness
ERE	Nicotiana glutinos	784	-	8	ATTTCATA
G-box	Zea mays	571	-	6	CACGTC	cis-acting regulatory element involved in light responsiveness
GATA-motif	Arabidopsis thaliana	168	-	10	AAGATAAGATT	part of a light responsive element
LTR	Hordeum vulgare	6	-	6	CCGAAA	cis-acting element involved in low-temperature responsiveness
MRE	Petroselinum crispum	1666	-	7	AACCTAA	MYB binding site involved in light responsiveness
MYB	Arabidopsis thaliana	1587	-	6	CAACCA
MYC	Arabidopsis thaliana	627	+	6	CATGTG	MYC/NAC binding site (New Place Id- S000413)
MYC	Arabidopsis thaliana	1043	+	6	CATTTG	MYC recognition site
MYC	Arabidopsis thaliana	954	+	6	CATTTG	MYC recognition site
MYC	Arabidopsis thaliana	1839	-	6	CATTTG	MYC recognition site
MYC	Arabidopsis thaliana	899	-	6	CATTTG	MYC recognition site
MYC	Arabidopsis thaliana	1778	+	6	CATTTG	MYC recognition site
MYC	Arabidopsis thaliana	988	+	6	CATTTG	MYC recognition site
MYC	Arabidopsis thaliana	998	-	6	CATTTG	MYC recognition site
MYC	Arabidopsis thaliana	834	-	6	CATTTG	MYC recognition site
MYC	Arabidopsis thaliana	1009	+	6	CATTTG	MYC recognition site
MYC	Arabidopsis thaliana	934	-	6	CATTTG	MYC recognition site
O2-site	Zea mays	1512	+	9	GATGACATGG	cis-acting regulatory element involved in zein metabolism regulation
O2-site	Zea mays	568	+	9	GTTGACGTGA	cis-acting regulatory element involved in zein metabolism regulation
P-box	Oryza sativa	116	-	7	CCTTTTG	gibberellin-responsive element
TATA	Arabidopsis thaliana	1539	+	8	TATAAAAT
TATA-box	Arabidopsis thaliana	2	+	4	TATA	core promoter element around -30 of transcription start
TATA-box	Arabidopsis thaliana	766	+	4	TATA	core promoter element around -30 of transcription start
TATA-box	Arabidopsis thaliana	135	-	5	TATAA	core promoter element around -30 of transcription start
TATA-box	Arabidopsis thaliana	1696	-	4	TATA	core promoter element around -30 of transcription start
TATA-box	Pisum sativum	133	-	7	TATAAAA	core promoter element around -30 of transcription start
TATA-box	Arabidopsis thaliana	801	+	4	TATA	core promoter element around -30 of transcription start
TATA-box	Arabidopsis thaliana	136	+	4	TATA	core promoter element around -30 of transcription start
TATA-box	Arabidopsis thaliana	1824	-	4	TATA	core promoter element around -30 of transcription start
TATA-box	Arabidopsis thaliana	21	+	4	TATA	core promoter element around -30 of transcription start
TATA-box	Brassica oleracea	1329	+	6	ATATAA	core promoter element around -30 of transcription start
TATA-box	Helianthus annuus	134	-	6	TATAAA	core promoter element around -30 of transcription start
TATA-box	Arabidopsis thaliana	1330	-	4	TATA	core promoter element around -30 of transcription start
TATA-box	Brassica napus	1346	+	6	ATTATA	core promoter element around -30 of transcription start
TATA-box	Arabidopsis thaliana	1347	-	5	TATAA	core promoter element around -30 of transcription start
TATA-box	Arabidopsis thaliana	1348	-	4	TATA	core promoter element around -30 of transcription start
TATA-box	Brassica oleracea	1538	+	6	ATATAA	core promoter element around -30 of transcription start
TATA-box	Arabidopsis thaliana	1539	-	4	TATA	core promoter element around -30 of transcription start
TATA-box	Arabidopsis thaliana	1639	-	4	TATA	core promoter element around -30 of transcription start
TATA-box	Arabidopsis thaliana	1694	-	6	TATATA	core promoter element around -30 of transcription start
TATA-box	Brassica napus	1695	-	6	ATATAT	core promoter element around -30 of transcription start
TCA	Pisum sativum	1651	+	9	TCATCTTCAT
TCA-element	Nicotiana tabacum	1229	+	9	CCATCTTTTT	cis-acting element involved in salicylic acid responsiveness
TCT-motif	Arabidopsis thaliana	175	+	6	TCTTAC	part of a light responsive element
TGACG-motif	Hordeum vulgare	51	+	5	TGACG	cis-acting regulatory element involved in the MeJA-responsiveness
TGACG-motif	Hordeum vulgare	570	+	5	TGACG	cis-acting regulatory element involved in the MeJA-responsiveness
TGACG-motif	Hordeum vulgare	325	+	5	TGACG	cis-acting regulatory element involved in the MeJA-responsiveness
W box	Arabidopsis thaliana	843	-	6	TTGACC
WUN-motif	Nicotiana glutinosa	1224	+	9	TTATTACAT
as-1	Arabidopsis thaliana	51	+	5	TGACG
as-1	Arabidopsis thaliana	570	+	5	TGACG
as-1	Arabidopsis thaliana	325	+	5	TGACG
ABRE	Hordeum vulgare	34	+	9	GCAACGTGTC	cis-acting element involved in the abscisic acid responsiveness
ABRE	Arabidopsis thaliana	1385	-	5	ACGTG	cis-acting element involved in the abscisic acid responsiveness
ABRE3a	Zea mays	1385	-	6	TACGTG
ABRE4	Zea mays	1385	+	6	CACGTA
CAAT-box	Nicotiana glutinosa	24	+	4	CAAT
CAAT-box	Daucus carota	756	+	11	AGCTCAATTTCA	common cis-acting element in promoter and enhancer regions
CAAT-box	Nicotiana glutinosa	555	+	4	CAAT
CAAT-box	Nicotiana glutinosa	1452	-	4	CAAT
CAAT-box	Nicotiana glutinosa	118	+	4	CAAT
CAAT-box	Nicotiana glutinosa	1062	-	4	CAAT
CAAT-box	Arabidopsis thaliana	689	+	5	CCAAT	common cis-acting element in promoter and enhancer regions
CAAT-box	Nicotiana glutinosa	1760	-	4	CAAT
CAAT-box	Nicotiana glutinosa	82	-	4	CAAT
CAAT-box	Pisum sativum	807	-	5	CAAAT	common cis-acting element in promoter and enhancer regions
CAAT-box	Nicotiana glutinosa	642	+	4	CAAT
CAAT-box	Nicotiana glutinosa	1532	-	4	CAAT
CAAT-box	Pisum sativum	350	+	5	CAAAT	common cis-acting element in promoter and enhancer regions
CAAT-box	Pisum sativum	1287	-	5	CAAAT	common cis-acting element in promoter and enhancer regions
CAAT-box	Nicotiana glutinosa	690	+	4	CAAT
CAAT-box	Pisum sativum	1934	-	5	CAAAT	common cis-acting element in promoter and enhancer regions
CAAT-box	Nicotiana glutinosa	692	-	4	CAAT
CAAT-box	Nicotiana glutinosa	65	-	4	CAAT
CAAT-box	Arabidopsis thaliana	582	-	5	CCAAT	common cis-acting element in promoter and enhancer regions
CAAT-box	Nicotiana glutinosa	1466	-	4	CAAT
CAAT-box	Nicotiana glutinosa	136	-	4	CAAT
CAAT-box	Pisum sativum	1278	+	5	CAAAT	common cis-acting element in promoter and enhancer regions
CAAT-box	Pisum sativum	675	+	5	CAAAT	common cis-acting element in promoter and enhancer regions
CAAT-box	Arabidopsis thaliana	117	+	5	CCAAT	common cis-acting element in promoter and enhancer regions
CAAT-box	Nicotiana glutinosa	462	+	4	CAAT
CAAT-box	Nicotiana glutinosa	1679	-	4	CAAT
CAAT-box	Pisum sativum	827	+	5	CAAAT	common cis-acting element in promoter and enhancer regions
CAAT-box	Nicotiana glutinosa	1405	+	4	CAAT
CAT-box	Arabidopsis thaliana	785	+	6	GCCACT	cis-acting regulatory element related to meristem expression
CGTCA-motif	Hordeum vulgare	1311	+	5	CGTCA	cis-acting regulatory element involved in the MeJA-responsiveness
G-box	Arabidopsis thaliana	1385	-	6	TACGTG	cis-acting regulatory element involved in light responsiveness
GARE-motif	Brassica oleracea	1032	+	7	TCTGTTG	gibberellin-responsive element
GARE-motif	Brassica oleracea	1181	-	7	TCTGTTG	gibberellin-responsive element
GT1-motif	Avena sativa	615	+	7	GGTTAAT	light responsive element
LTR	Hordeum vulgare	1101	+	6	CCGAAA	cis-acting element involved in low-temperature responsiveness
MYB	Arabidopsis thaliana	276	+	6	CAACCA	MYB recognition site
MYB	Arabidopsis thaliana	1181	+	6	CAACAG	MYB recognition site
MYB	Arabidopsis thaliana	671	+	6	CAACCA	MYB recognition site
MYB	Arabidopsis thaliana	614	-	6	TAACCA	MYB recognition site
MYB	Arabidopsis thaliana	1033	-	6	CAACAG	MYB recognition site
MYB-like sequence	Arabidopsis thaliana	614	-	6	TAACCA	MYB recognition site
MYC	Arabidopsis thaliana	690	+	6	CAATTG	MYB recognition site
MYC	Arabidopsis thaliana	1278	-	6	CATTTG	MYB recognition site
Myb	Arabidopsis thaliana	1571	-	6	TAACTG	MYB recognition site
Myb-binding site	Nicotiana tabacum	1033	-	6	CAACAG	MYB binding site
Myb-binding site	Nicotiana tabacum	1181	+	6	CAACAG	MYB binding site
Myc	Arabidopsis thaliana	1671	+	7	TCTCTTA	MYC recognition site
O2-site	Zea mays	1308	-	9	GTTGACGTGA	cis-acting regulatory element involved in zein metabolism regulation
STRE	Arabidopsis thaliana	252	+	5	AGGGG	Stress responsive element
STRE	Arabidopsis thaliana	1525	+	5	AGGGG	Stress responsive element
STRE	Arabidopsis thaliana	1163	+	5	AGGGG	Stress responsive element
TATA-box	Arabidopsis thaliana	441	+	8	TATTTAAA	core promoter element around -30 of transcription start
TATA-box	Arabidopsis thaliana	894	+	4	TATA	core promoter element around -30 of transcription start
TATA-box	Arabidopsis thaliana	649	+	4	TATA	core promoter element around -30 of transcription start
TATA-box	Arabidopsis thaliana	937	+	4	TATA	core promoter element around -30 of transcription start
TATA-box	Arabidopsis thaliana	499	+	4	TATA	core promoter element around -30 of transcription start
TATA-box	Brassica napus	935	+	6	ATTATA	core promoter element around -30 of transcription start
TATA-box	Arabidopsis thaliana	1202	-	4	TATA	core promoter element around -30 of transcription start
TATA-box	Arabidopsis thaliana	1444	-	5	TATAA	core promoter element around -30 of transcription start
TATA-box	Arabidopsis thaliana	871	+	4	TATA	core promoter element around -30 of transcription start
TATA-box	Arabidopsis thaliana	1132	-	4	TATA	core promoter element around -30 of transcription start
TATA-box	Arabidopsis thaliana	1426	-	4	TATA	core promoter element around -30 of transcription start
TATA-box	Zea mays	495	-	8	TATAAGAA	core promoter element around -30 of transcription start
TATA-box	Arabidopsis thaliana	1675	-	5	TATAA	core promoter element around -30 of transcription start
TATA-box	Arabidopsis thaliana	932	+	4	TATA	core promoter element around -30 of transcription start
TATA-box	Arabidopsis thaliana	1381	-	4	TATA	core promoter element around -30 of transcription start
TATA-box	Oryza sativa	792	-	8	TACATAAA	core promoter element around -30 of transcription start
TATA-box	Arabidopsis thaliana	1640	-	4	TATA	core promoter element around -30 of transcription start
TATA-box	Arabidopsis thaliana	956	+	4	TATA	core promoter element around -30 of transcription start
TATA-box	Arabidopsis thaliana	1440	-	4	TATA	core promoter element around -30 of transcription start
TATA-box	Arabidopsis thaliana	563	+	4	TATA	core promoter element around -30 of transcription start
TATA-box	Arabidopsis thaliana	1774	-	4	TATA	core promoter element around -30 of transcription start
TATA-box	Arabidopsis thaliana	936	-	5	TATAA	core promoter element around -30 of transcription start
TATA-box	Helianthus annuus	1379	-	6	TATACA	core promoter element around -30 of transcription start
TATA-box	Arabidopsis thaliana	876	+	4	TATA	core promoter element around -30 of transcription start
TATA-box	Arabidopsis thaliana	1445	-	4	TATA	core promoter element around -30 of transcription start
TATA-box	Arabidopsis thaliana	1012	-	4	TATA	core promoter element around -30 of transcription start
TATA-box	Helianthus annuus	1438	-	6	TATACA	core promoter element around -30 of transcription start
TATA-box	Oryza sativa	436	-	7	TACAAAA	core promoter element around -30 of transcription start
TATA-box	Arabidopsis thaliana	1676	-	4	TATA	core promoter element around -30 of transcription start
TATA-box	Arabidopsis thaliana	498	-	5	TATAA	core promoter element around -30 of transcription start
TATA-box	Arabidopsis thaliana	1667	-	4	TATA	core promoter element around -30 of transcription start
TATA-box	Brassica napus	1425	-	6	ATATAT	core promoter element around -30 of transcription start
TATA-box	Brassica napus	1443	+	6	ATTATA	core promoter element around -30 of transcription start
TCA	Pisum sativum	141	+	9	TCATCTTCAT
TCA	Pisum sativum	1228	-	9	TCATCTTCAT
TCT-motif	Arabidopsis thaliana	1560	-	6	TCTTAC	part of a light responsive element
TGA-box	Glycine max	1308	-	8	TGACGTAA	part of an auxin-responsive element
TGA-element	Brassica oleracea	743	-	6	AACGAC	auxin-responsive element
TGACG-motif	Hordeum vulgare	1311	-	5	TGACG	cis-acting regulatory element involved in the MeJA-responsiveness
WRE3	Pisum sativum	738	-	6	CCACCT
as-1	Arabidopsis thaliana	1311	-	5	TGACG
